# Supplementary material for: Polyketide Derivatives from the Endophytic Fungus Phaeosphaeria sp. LF5 Isolated from Huperzia serrata and Their Acetylcholinesterase Inhibitory Activities
Source: MDPI journal article supplement (doi:10.3390/jof8030232), 2022-02-26
Supplement: s1 [file s1]

*Supporting Information for*

# **Polyketide Derivatives from the Endophytic Fungus *Phaeosphaeria* sp. LF5 Isolated from *Huperzia serrata* and Their Acetylcholinesterase Inhibitory Activities**

Yiwen Xiao <sup>1,2,†</sup>, Weizhong Liang <sup>2,†</sup>, Zhibin Zhang <sup>1</sup>, Ya Wang <sup>2</sup>, Shanshan Zhang <sup>2</sup>, Jiantao Liu <sup>2</sup>, Jun Chang <sup>2</sup>, Changjiu Ji <sup>3</sup> and Du Zhu <sup>1,2,\*</sup>

<sup>1</sup> Key Laboratory of Protection and Utilization of Subtropic Plant Resources of Jiangxi Province, College of Life Sciences, Jiangxi Normal University, Nanchang 330022, China; xyw1152858687@163.com (Y.X.); zzbbio@jxnu.edu.cn (Z.Z.)

<sup>2</sup> Key Laboratory of Bioprocess Engineering of Jiangxi Province, College of Life Sciences, Jiangxi Science and Technology Normal University, Nanchang 330013, China; lwz271508312@163.com (W.L.); jxwangya@126.com (Y.W.); zss18135437140@163.com (S.Z.); liujt@jxstnu.edu.cn (J.L.); changjun@jxstnu.edu.cn (J.C.)

<sup>3</sup> College of Chemistry and Biological Engineering, Yichun University, Yichun 336000, China; jichjiu999@jycu.edu.cn

\* Correspondence: zhudu@jxstnu.edu.cn; Tel.: +86-79188121934

† These authors contributed equally to this work.

Table S1. Acetylcholinesterase inhibitory activities of the crude extracts

Figure list: HR-ESI-MS, 1D and 2D NMR spectra data for compounds **1-11**

Figure S1.  $^1\text{H}$  NMR spectrum of compound **1** in  $\text{CD}_3\text{OD}$

Figure S2.  $^{13}\text{C}$  NMR spectrum of compound **1** in  $\text{CD}_3\text{OD}$

Figure S3.  $^1\text{H}$  NMR spectrum of compound **2** in  $\text{CD}_3\text{OD}$

Figure S4.  $^{13}\text{C}$  NMR spectrum of compound **2** in  $\text{CD}_3\text{OD}$

Figure S5.  $^1\text{H}$  NMR spectrum of compound **3** in  $\text{CD}_3\text{OD}$

Figure S6.  $^{13}\text{C}$  NMR spectrum of compound **3** in  $\text{CD}_3\text{OD}$

Figure S7.  $^1\text{H}$  NMR spectrum of compound **4** in  $\text{CD}_3\text{OD}$

Figure S8.  $^{13}\text{C}$  NMR spectrum of compound **4** in  $\text{CD}_3\text{OD}$

Figure S9.  $^1\text{H}$ - $^1\text{H}$  COSY spectrum of compound **4** in  $\text{CD}_3\text{OD}$

Figure S10. DEPT 90 spectrum of compound **4** in  $\text{CD}_3\text{OD}$

Figure S11. DEPT 135 spectrum of compound **4** in  $\text{CD}_3\text{OD}$

Figure S12. HSQC spectrum of compound **4** in  $\text{CD}_3\text{OD}$

Figure S13. HMBC spectrum of compound **4** in  $\text{CD}_3\text{OD}$

Figure S14. NOESY spectrum of compound **4** in  $\text{CD}_3\text{OD}$

Figure S15. HRESIMS spectrum of compound **4**

Figure S16.  $^1\text{H}$  NMR spectrum of compound **5** in  $\text{CD}_3\text{OD}$

Figure S17.  $^{13}\text{C}$  NMR spectrum of compound **5** in  $\text{CD}_3\text{OD}$

Figure S18.  $^1\text{H}$  NMR spectrum of compound **6** in  $\text{CD}_3\text{OD}$

Figure S19.  $^{13}\text{C}$  NMR spectrum of compound **6** in  $\text{CD}_3\text{OD}$

Figure S20.  $^1\text{H}$  NMR spectrum of compound **7** in  $\text{CD}_3\text{OD}$

Figure S21.  $^{13}\text{C}$  NMR spectrum of compound **7** in  $\text{CD}_3\text{OD}$

Figure S22.  $^1\text{H}$ - $^1\text{H}$  COSY spectrum of compound **7** in  $\text{CD}_3\text{OD}$

Figure S23. HSQC spectrum of compound **7** in  $\text{CD}_3\text{OD}$

Figure S24. HMBC spectrum of compound **7** in  $\text{CD}_3\text{OD}$

Figure S25. NOESY spectrum of compound **7** in  $\text{CD}_3\text{OD}$

Figure S26. HRESIMS spectrum of compound **7**

Figure S27.  $^1\text{H}$  NMR spectrum of compound **8** in  $\text{CD}_3\text{OD}$

Figure S28.  $^{13}\text{C}$  NMR spectrum of compound **8** in  $\text{CD}_3\text{OD}$

Figure S29.  $^1\text{H}$  NMR spectrum of compound **9** in  $\text{DMSO}-d_6$

Figure S30.  $^{13}\text{C}$  NMR spectrum of compound **9** in  $\text{DMSO}-d_6$

Figure S31. DEPT 90 spectrum of compound **9** in  $\text{DMSO}-d_6$

Figure S32. DEPT 135 spectrum of compound **9** in  $\text{DMSO}-d_6$

Figure S33.  $^1\text{H}$ - $^1\text{H}$  COSY spectrum of compound **9** in  $\text{DMSO}-d_6$

Figure S34. HSQC spectrum of compound **9** in  $\text{DMSO}-d_6$

Figure S35. HMBC spectrum of compound **9** in  $\text{DMSO}-d_6$

Figure S36. NOESY spectrum of compound **9** in  $\text{DMSO}-d_6$

Figure S37. HRESIMS spectrum of compound **9**

Figure S38.  $^1\text{H}$  NMR spectrum of compound **10** in  $\text{CD}_3\text{OD}$

Figure S39.  $^{13}\text{C}$  NMR spectrum of compound **10** in  $\text{CD}_3\text{OD}$

Figure S40.  $^1\text{H}$  NMR spectrum of compound **11** in  $\text{CD}_3\text{OD}$

Figure S41.  $^{13}\text{C}$  NMR spectrum of compound **11** in  $\text{CD}_3\text{OD}$

**Table S1.** Acetylcholinesterase inhibitory activities of the crude extracts.

| Sample                  | Inhibition effects | Sample                | Inhibition effects |
|-------------------------|--------------------|-----------------------|--------------------|
|                         | (%) <sup>a</sup>   |                       | (%) <sup>a</sup>   |
| Petroleum ether extract | 47.23 ± 0.40       | Ethyl acetate extract | 82.68 ± 1.60       |
| Hup-A                   | 93.20±0.30         | Buthanol extract      | 15.82 ± 1.20       |

<sup>a</sup> Expressed as the mean ± SD of three parallel measurements (p<0.05).

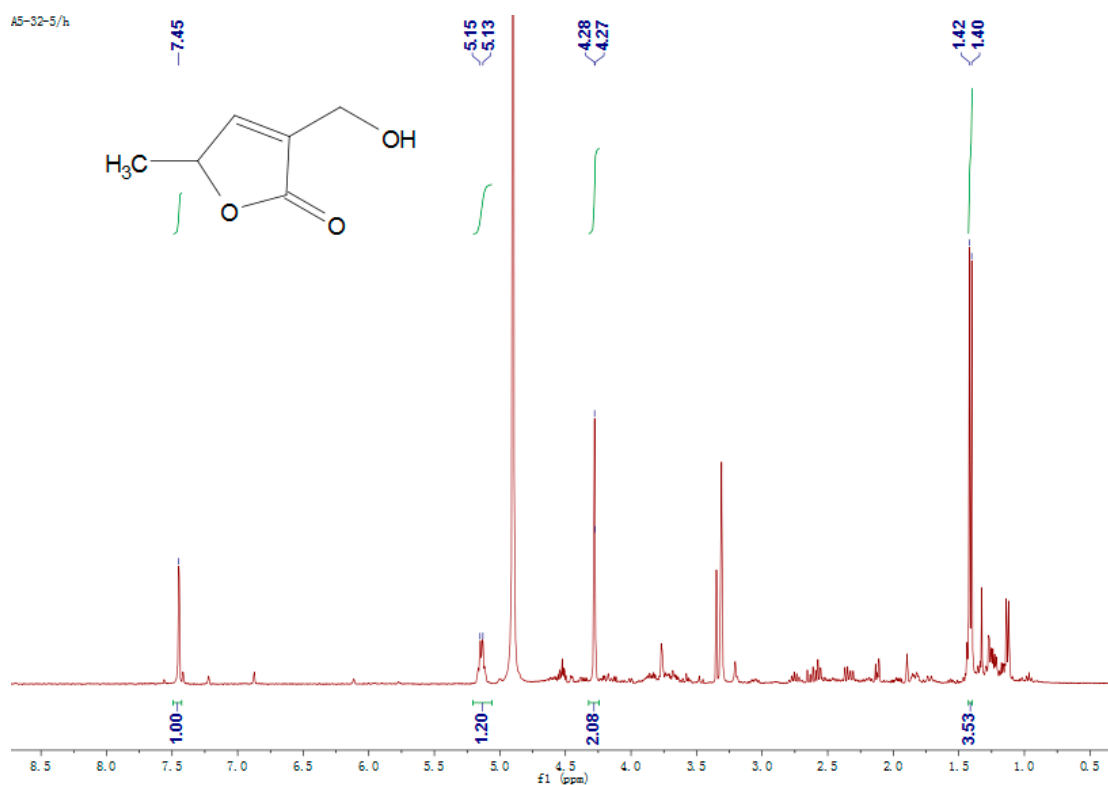

**Figure S1.** <sup>1</sup>H NMR spectrum of compound **1** in CD<sub>3</sub>OD.

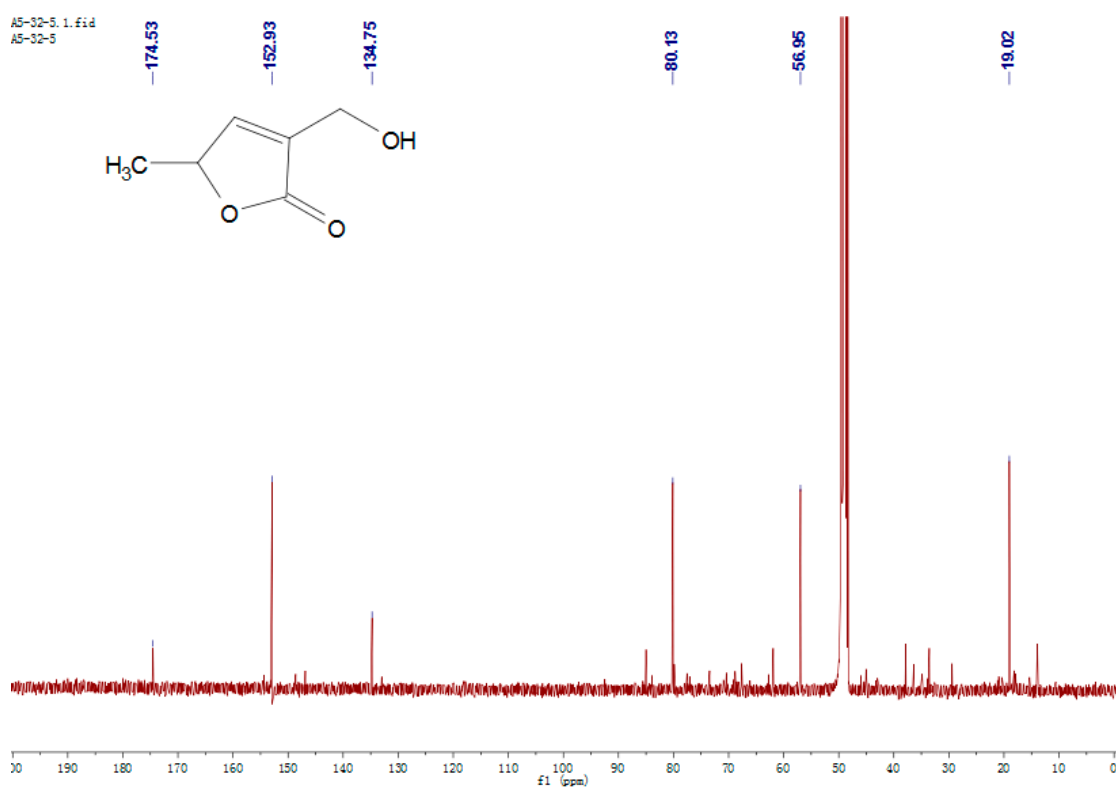

**Figure S2.** <sup>13</sup>C NMR spectrum of compound **1** in CD<sub>3</sub>OD.

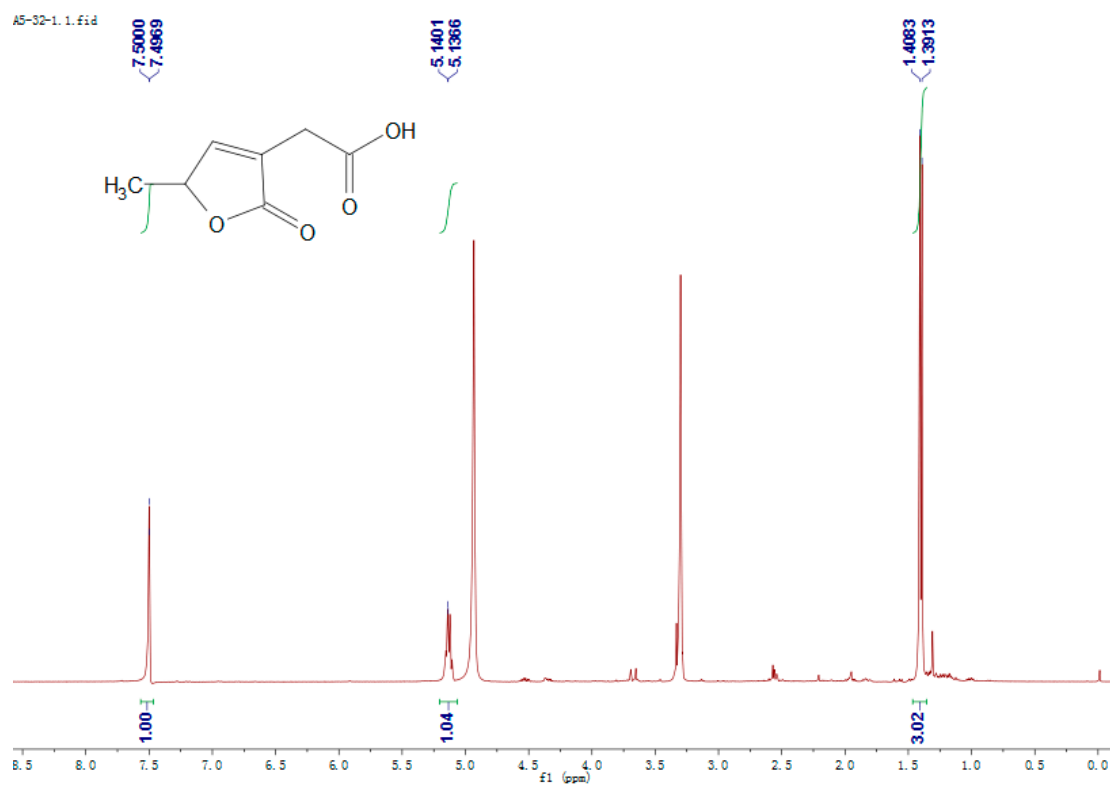

**Figure S3.** <sup>1</sup>H NMR spectrum of compound **2** in CD<sub>3</sub>OD.

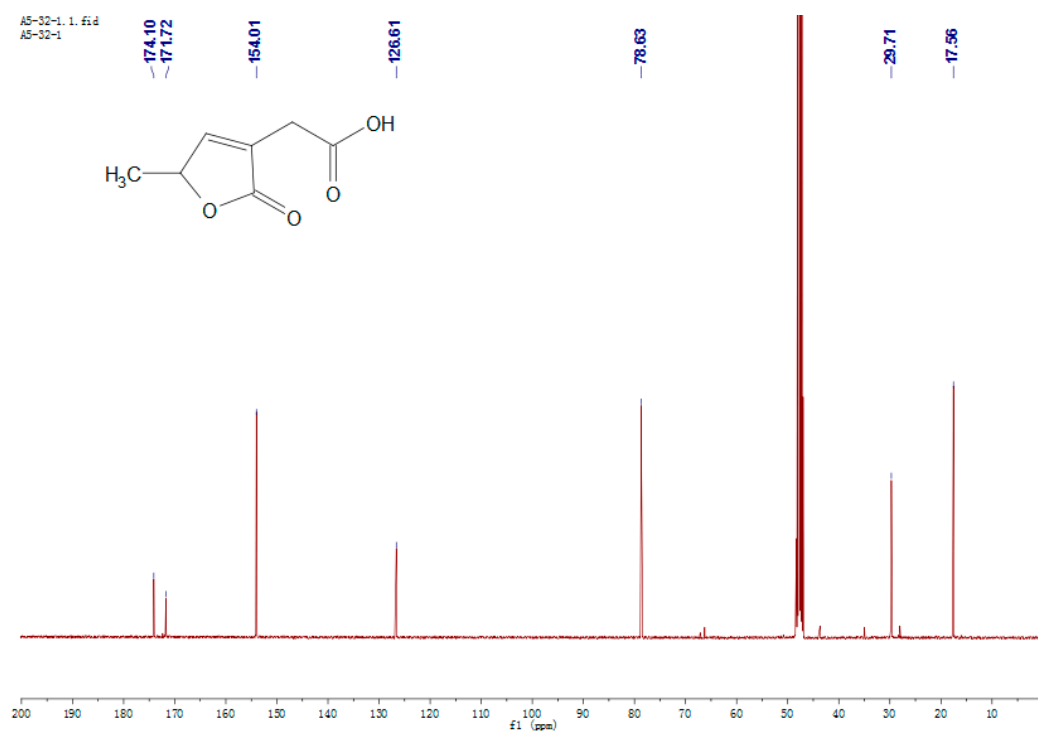

**Figure S4.** <sup>13</sup>C NMR spectrum of compound **2** in CD<sub>3</sub>OD.

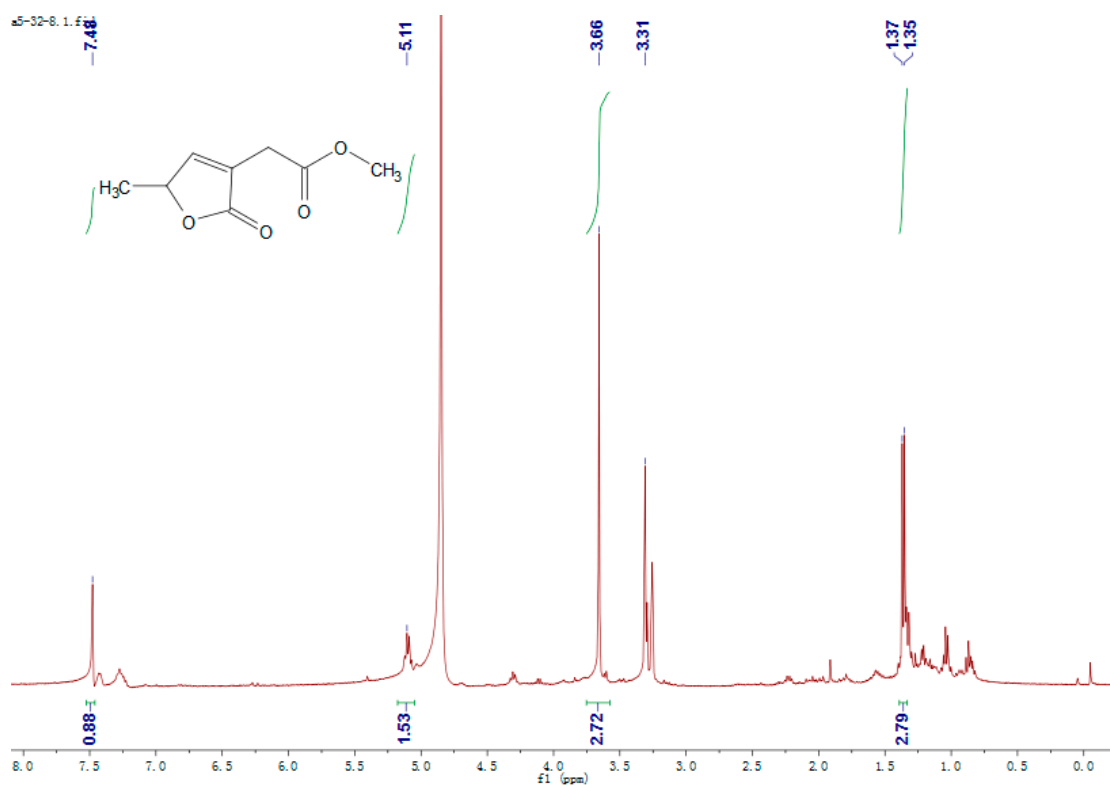

**Figure S5.** <sup>1</sup>H NMR spectrum of compound **3** in CD<sub>3</sub>OD.

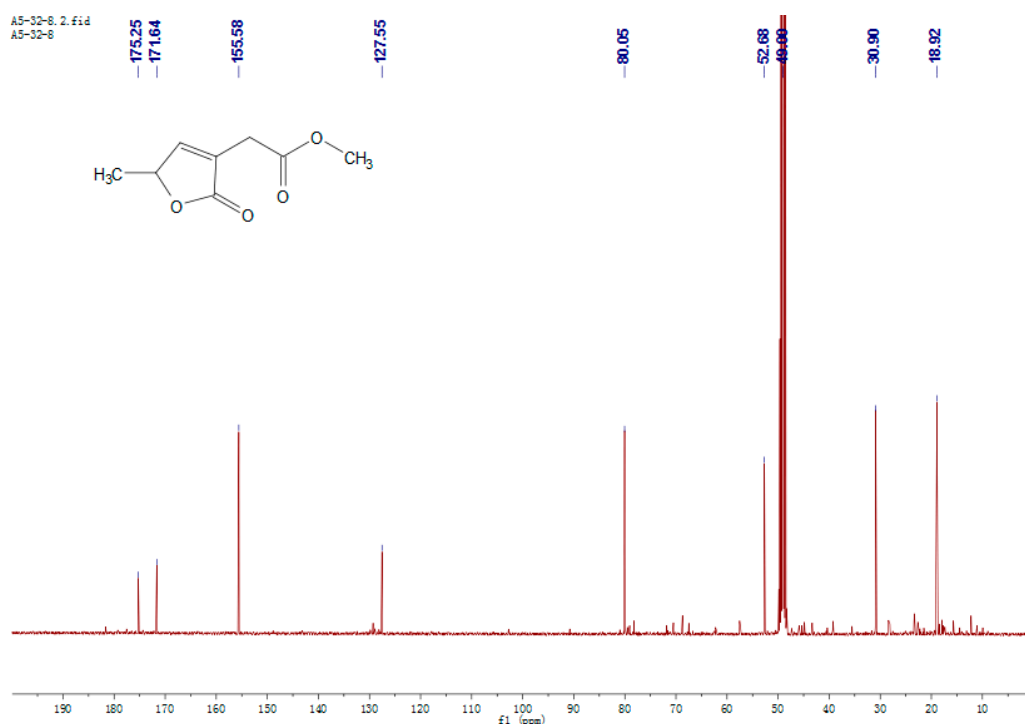

**Figure S6.** <sup>13</sup>C NMR spectrum of compound **3** in CD<sub>3</sub>OD.

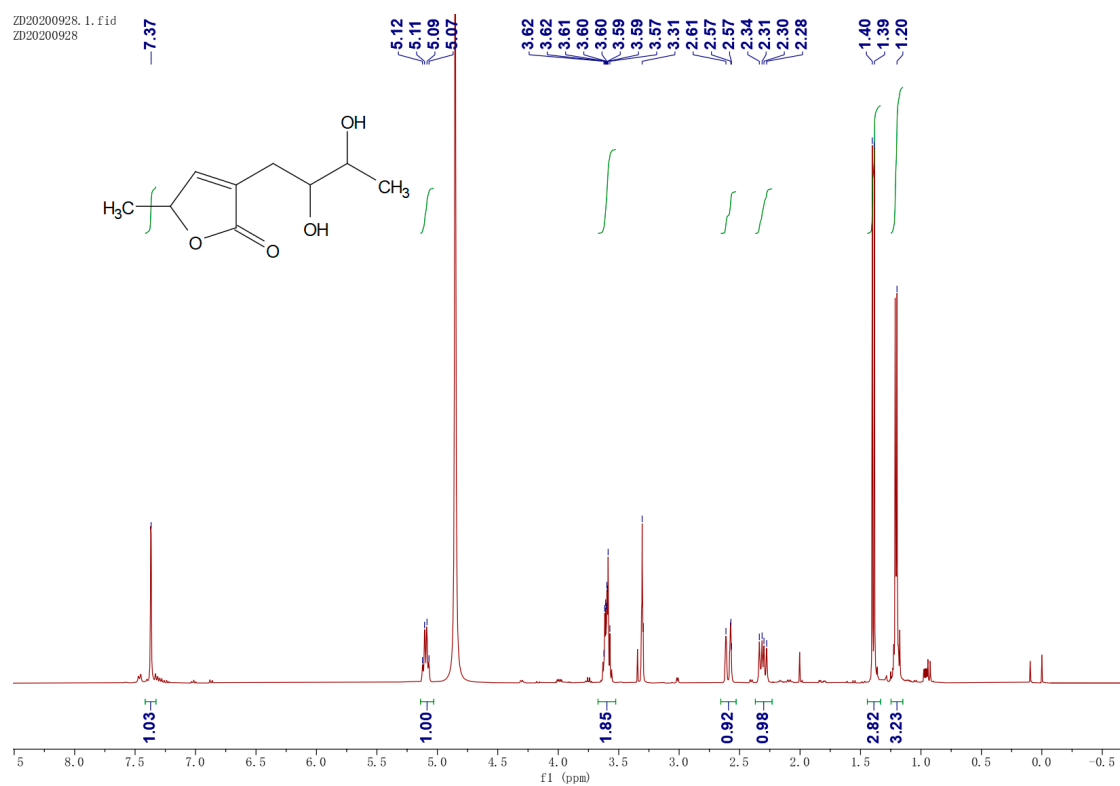

**Figure S7.**  $^1\text{H}$  NMR spectrum of compound 4 in  $\text{CD}_3\text{OD}$ .

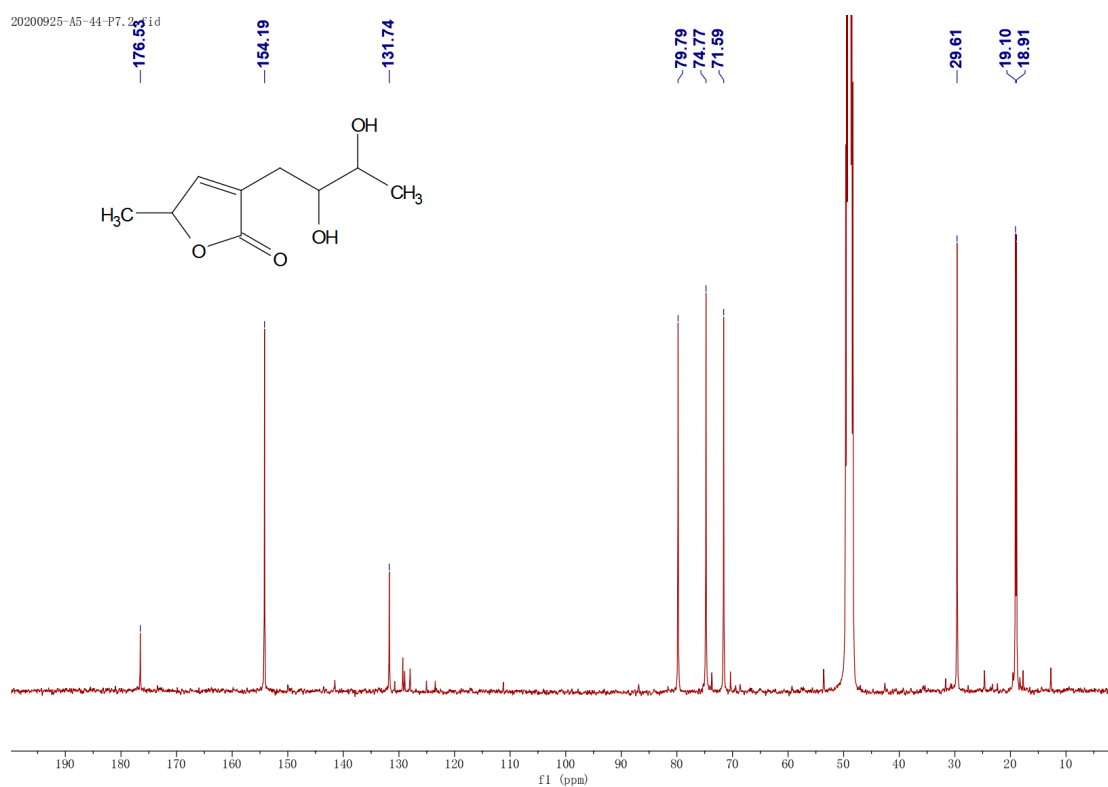

Figure S8. <sup>13</sup>C NMR spectrum of compound 4 in CD<sub>3</sub>OD.

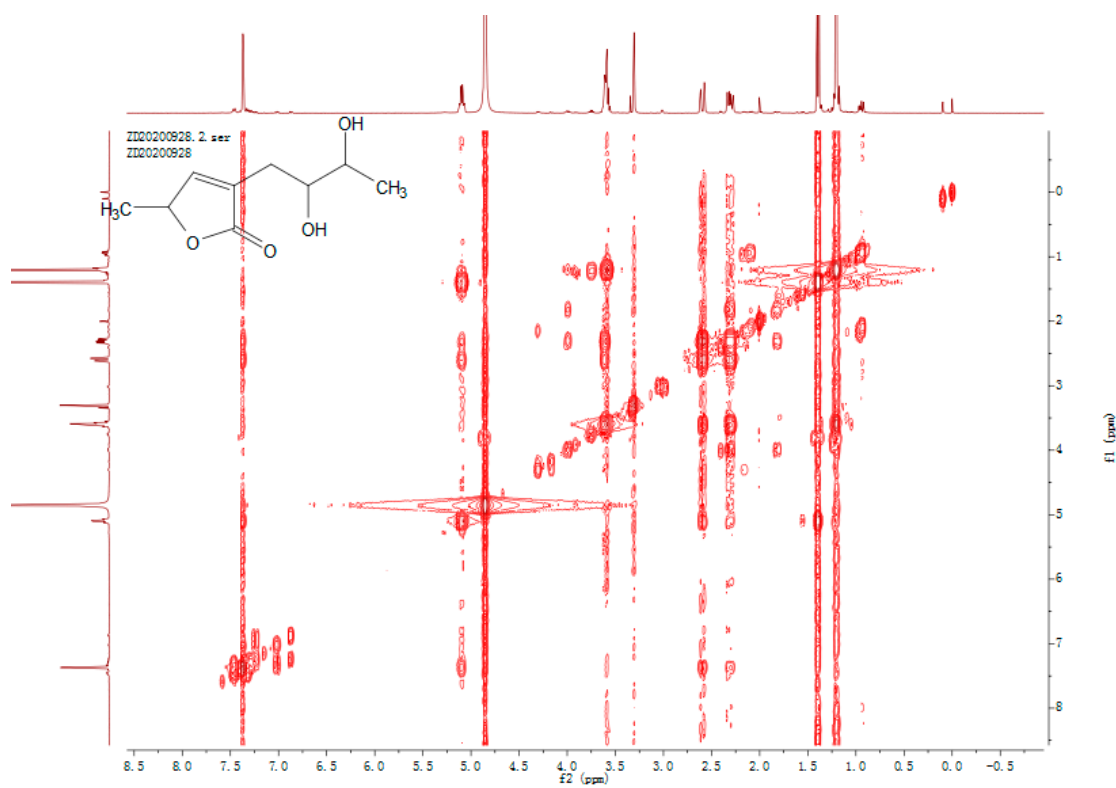

Figure S9. <sup>1</sup>H-<sup>1</sup>H COSY spectrum of compound 4 in CD<sub>3</sub>OD.



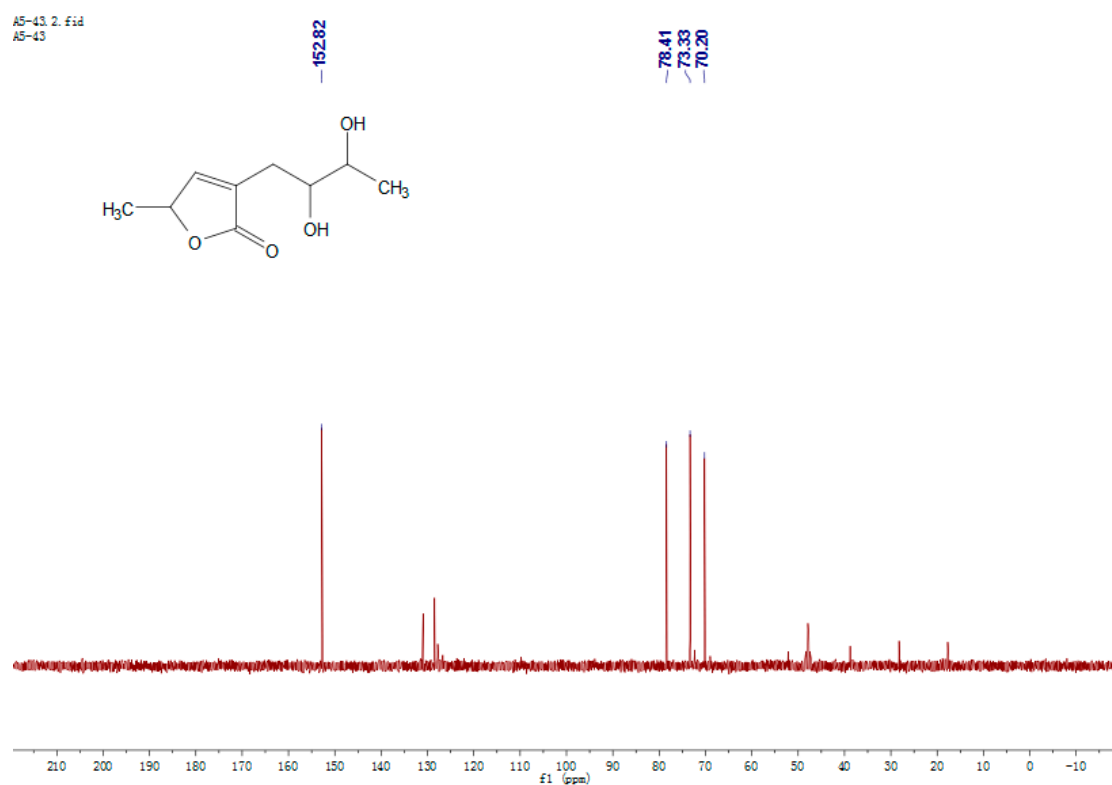

**Figure S10.** DEPT 90 spectrum of compound **4** in CD<sub>3</sub>OD.

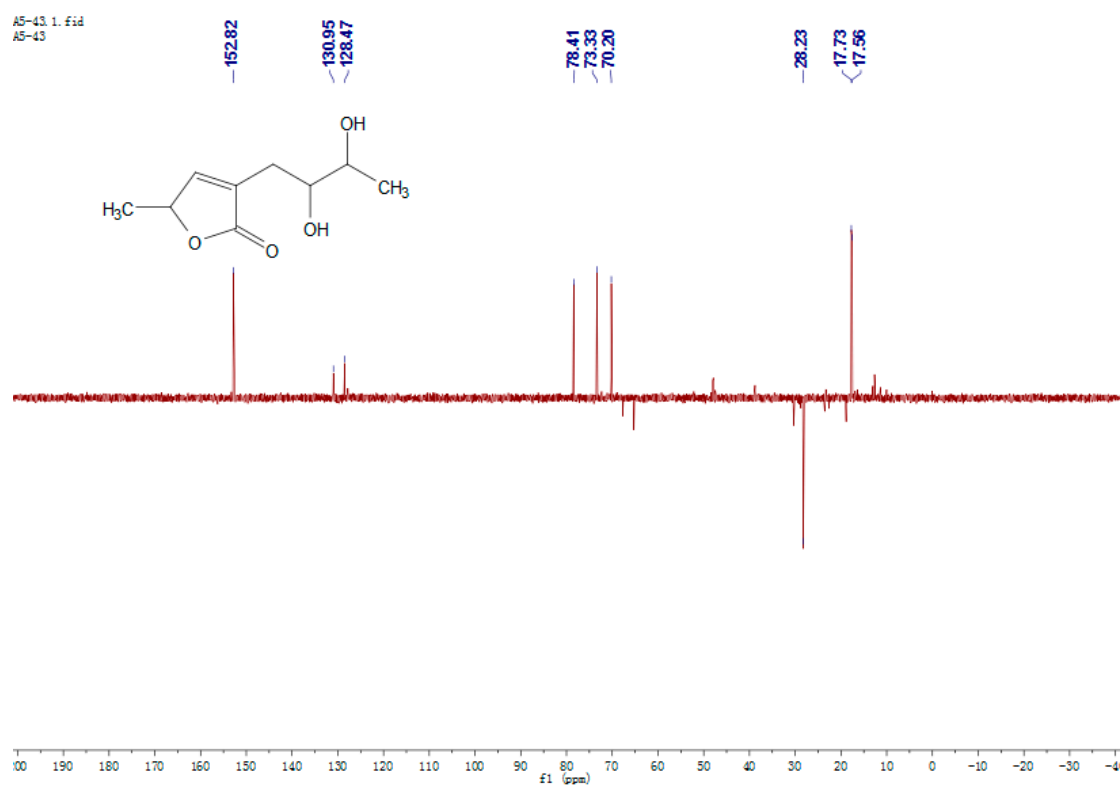

**Figure S11.** DEPT 135 spectrum of compound **4** in CD<sub>3</sub>OD.

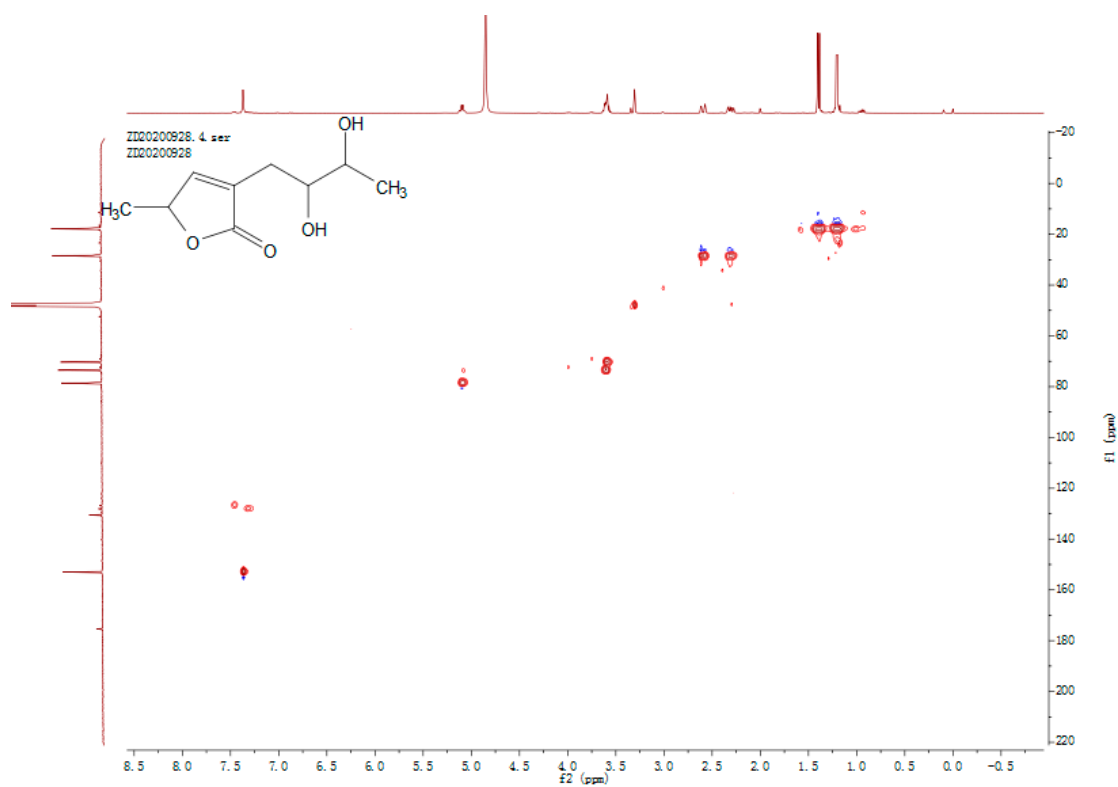

**Figure S12.** HSQC spectrum of compound **4** in CD<sub>3</sub>OD.

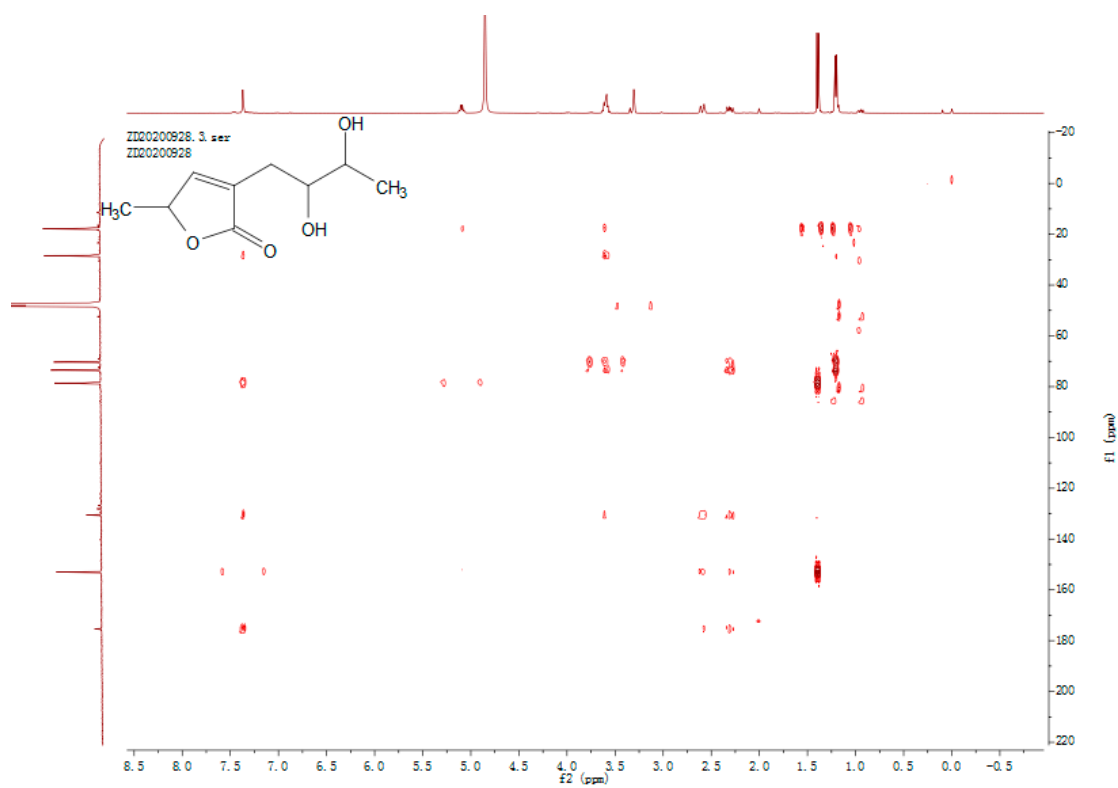

**Figure S13.** HMBC spectrum of compound **4** in CD<sub>3</sub>OD.

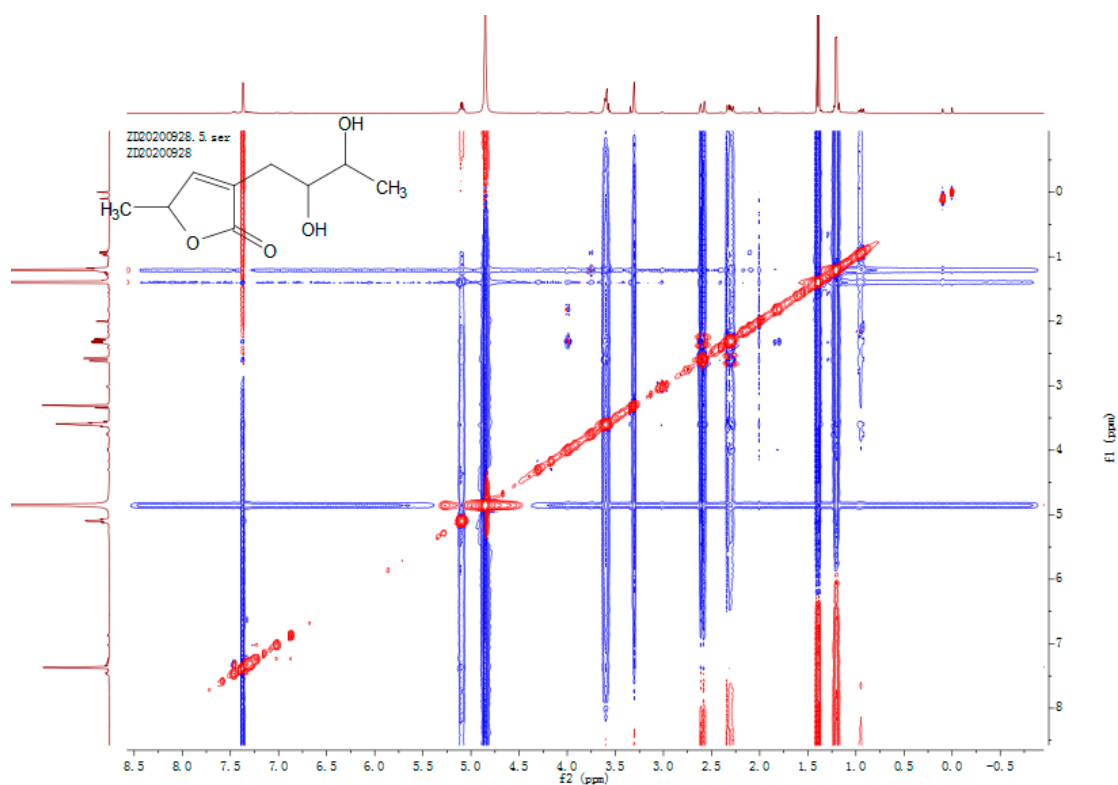

**Figure S14.** NOESY spectrum of compound **4** in CD<sub>3</sub>OD.

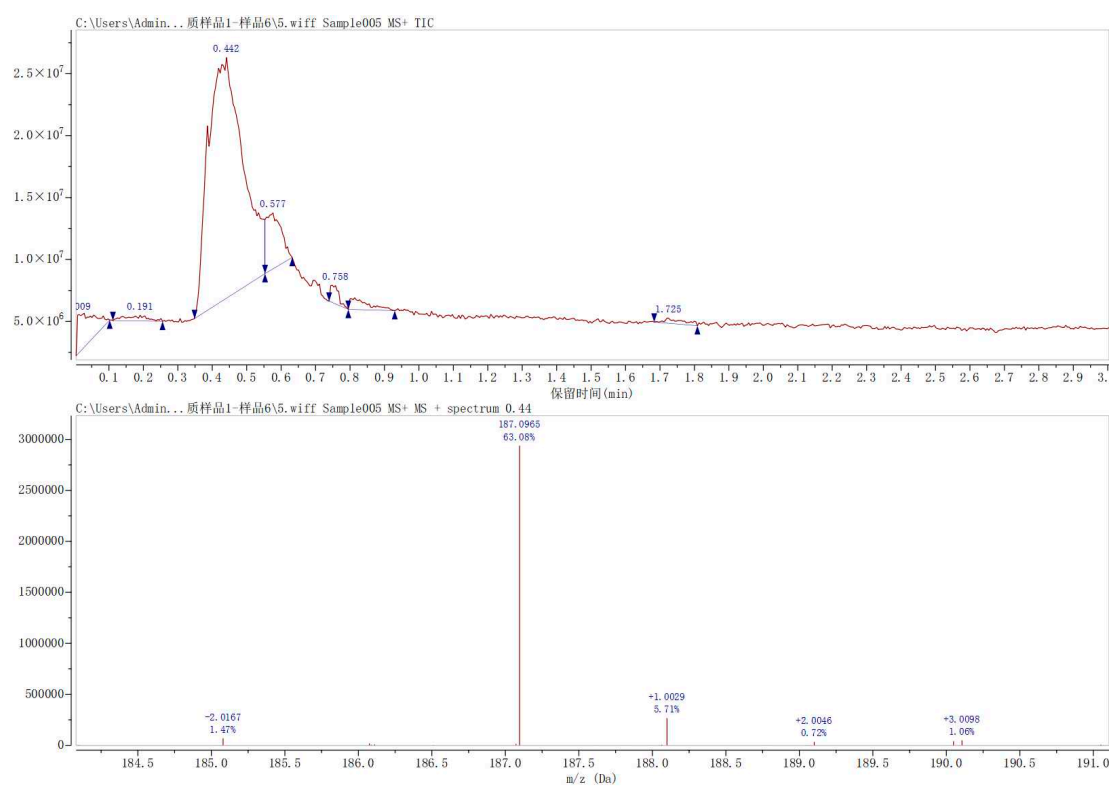

**Figure S15.** HRESIMS spectrum of compound **4**.

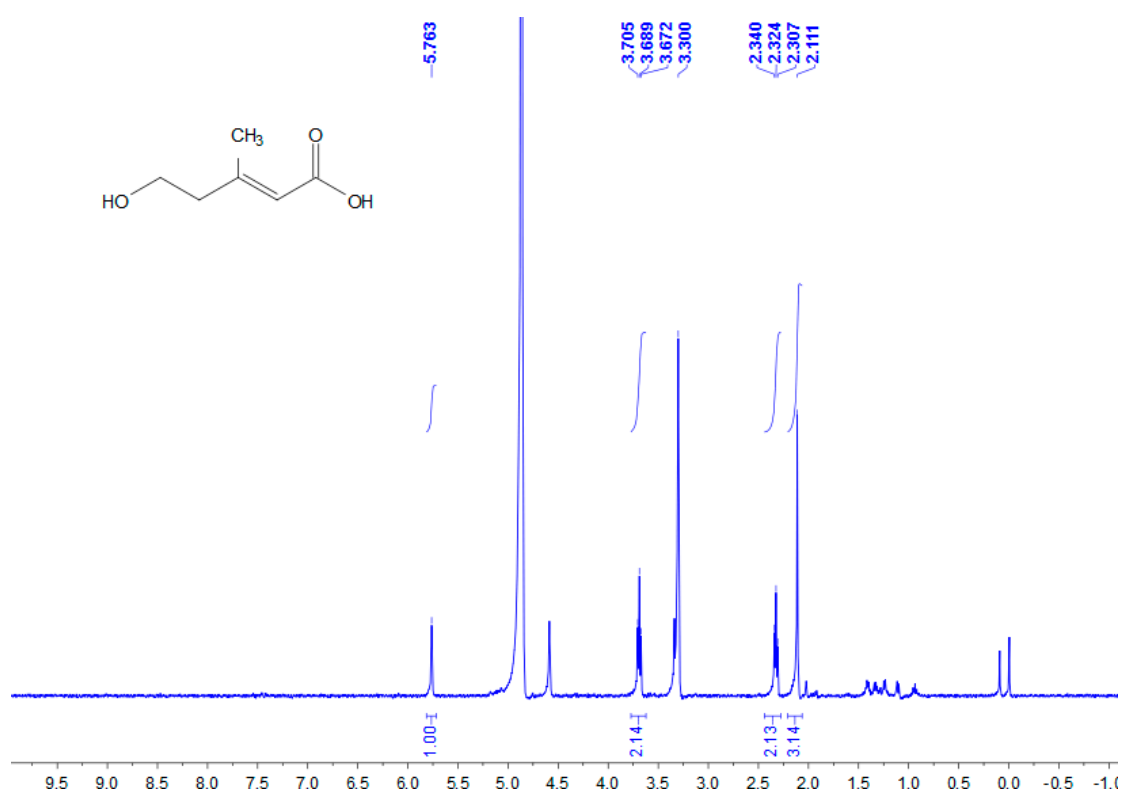

**Figure S16.** <sup>1</sup>H NMR spectrum of compound **5** in CD<sub>3</sub>OD.

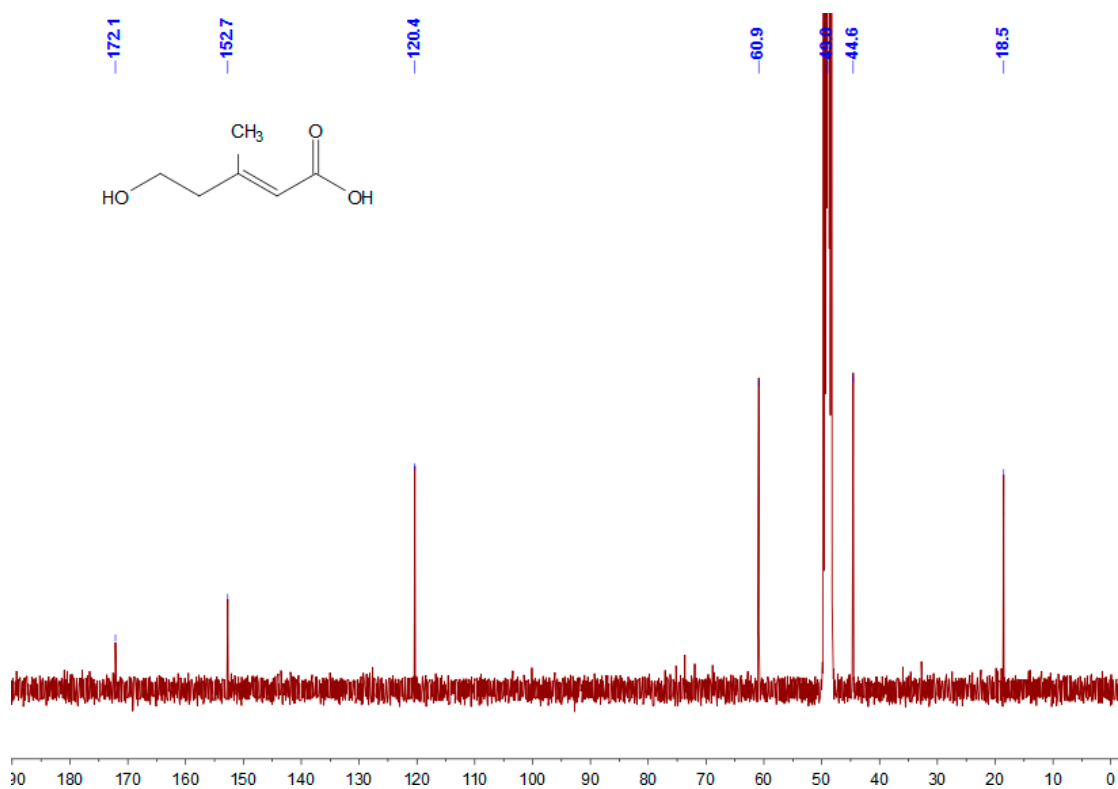

**Figure S17.** <sup>13</sup>C NMR spectrum of compound **5** in CD<sub>3</sub>OD.

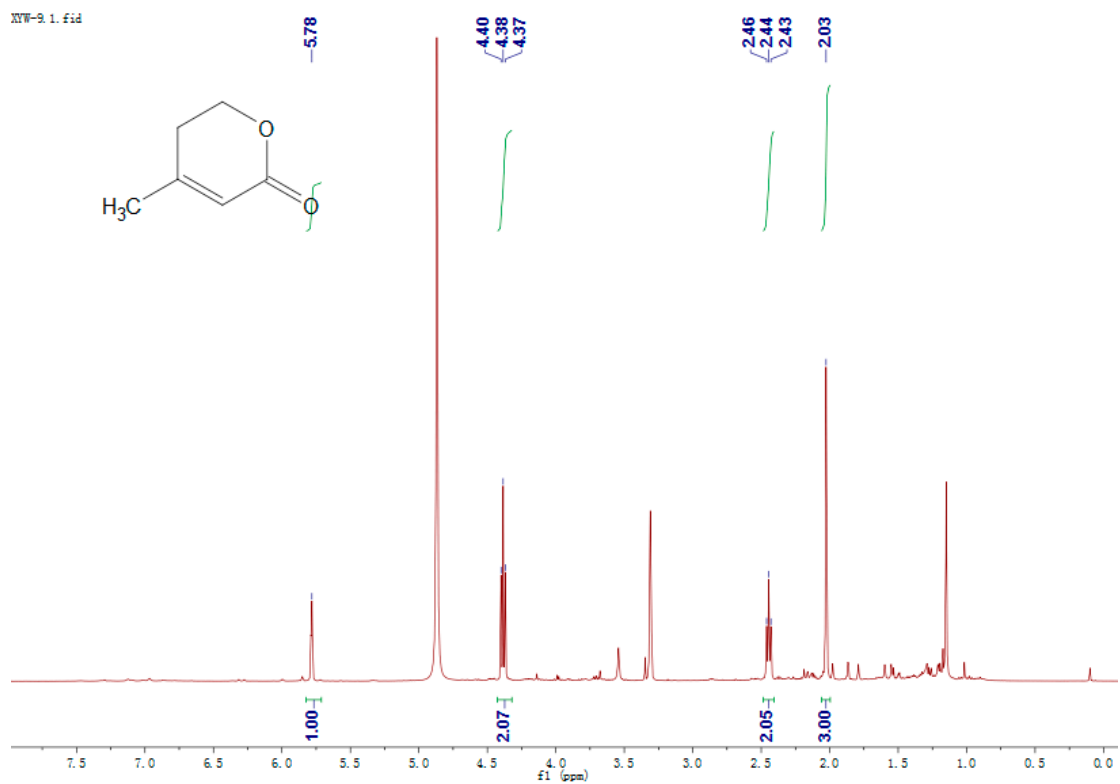

**Figure S18.** <sup>1</sup>H NMR spectrum of compound **6** in CD<sub>3</sub>OD.

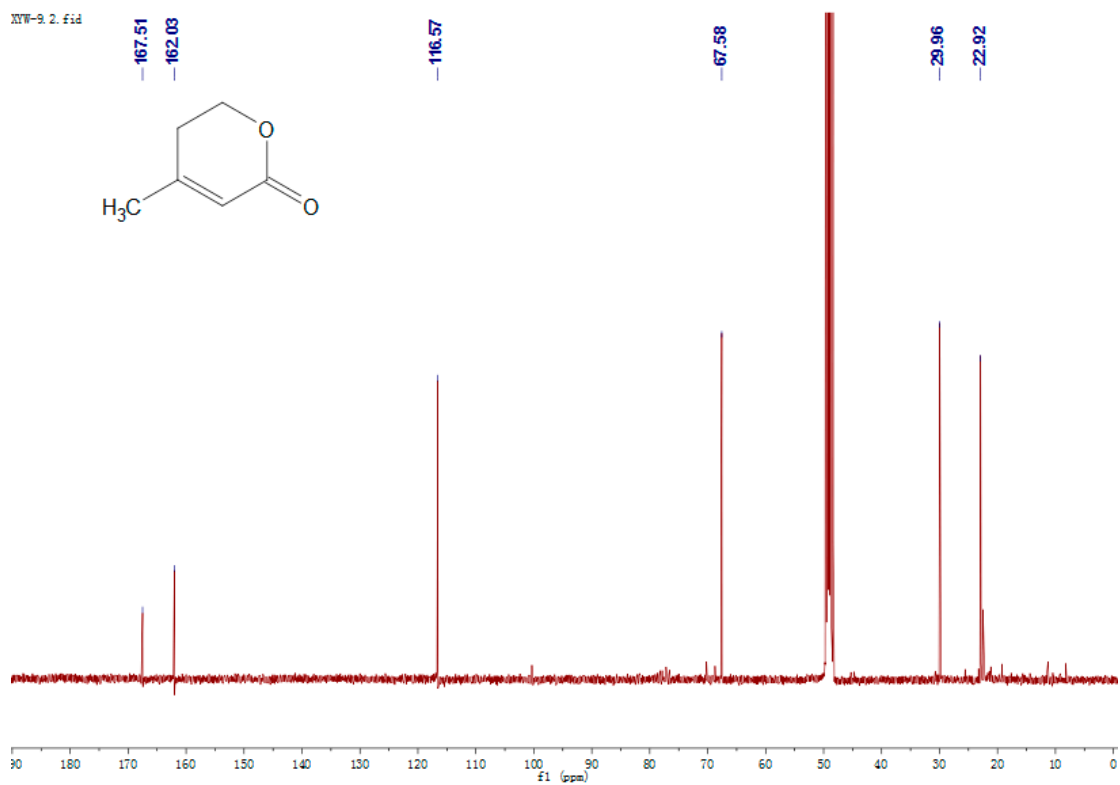

**Figure S19.** <sup>13</sup>C NMR spectrum of compound **6** in CD<sub>3</sub>OD.

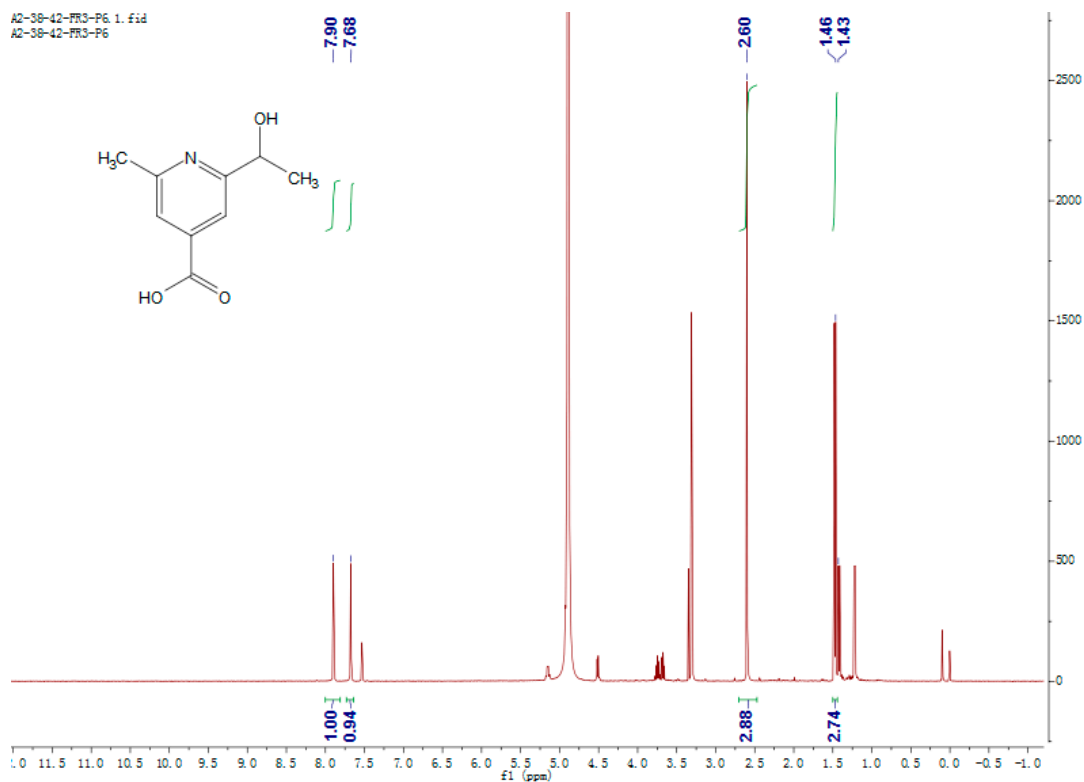

**Figure S20.** <sup>1</sup>H NMR spectrum of compound **7** in CD<sub>3</sub>OD.

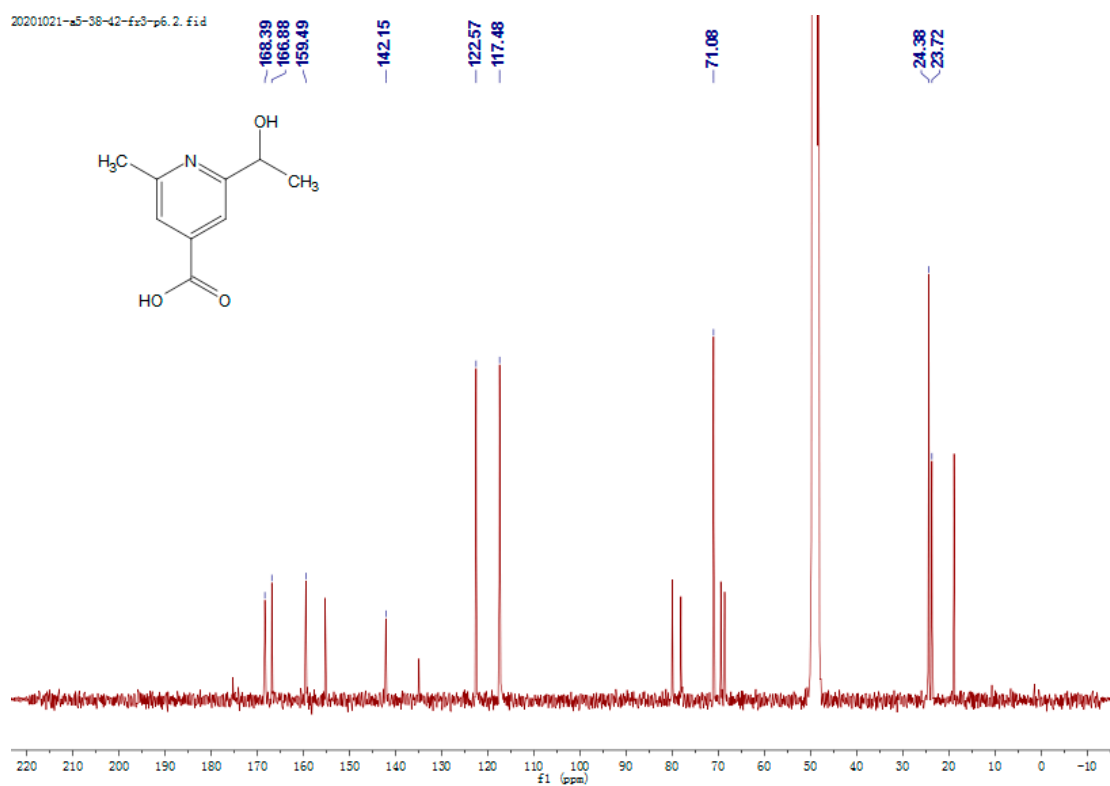

**Figure S21.** <sup>13</sup>C NMR spectrum of compound **7** in CD<sub>3</sub>OD.

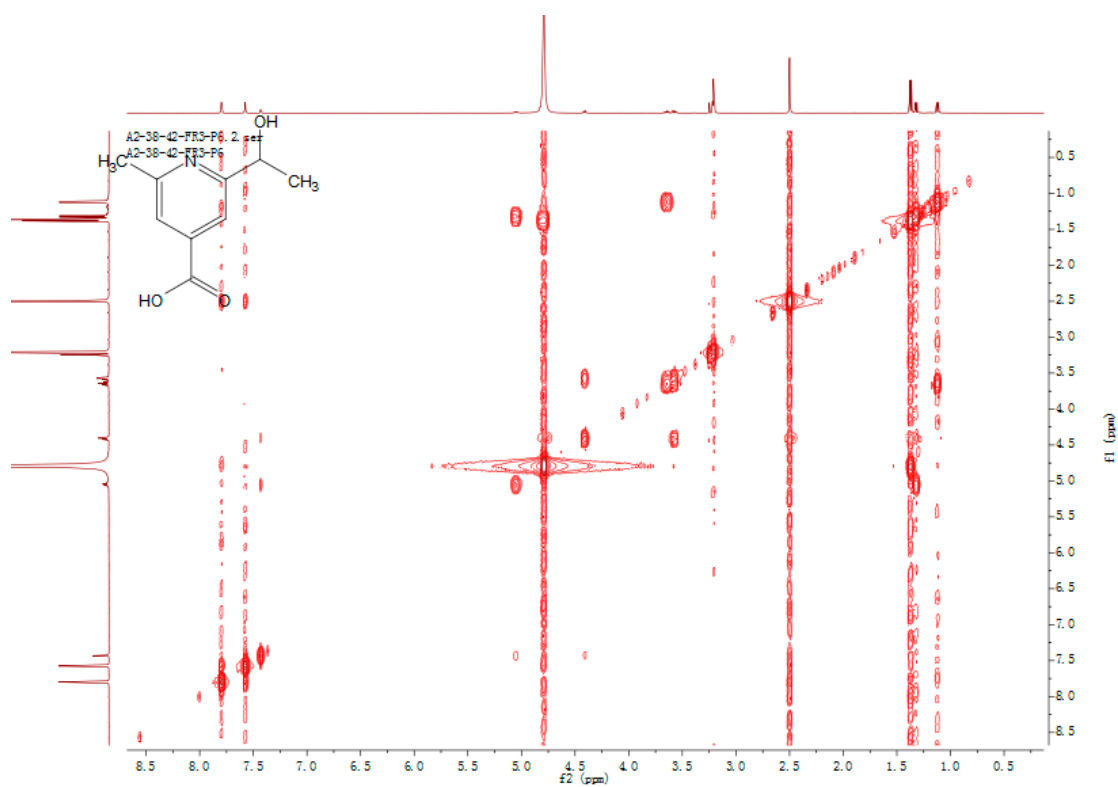

**Figure S22.**  $^1\text{H}$ - $^1\text{H}$  COSY spectrum of compound **7** in  $\text{CD}_3\text{OD}$ .

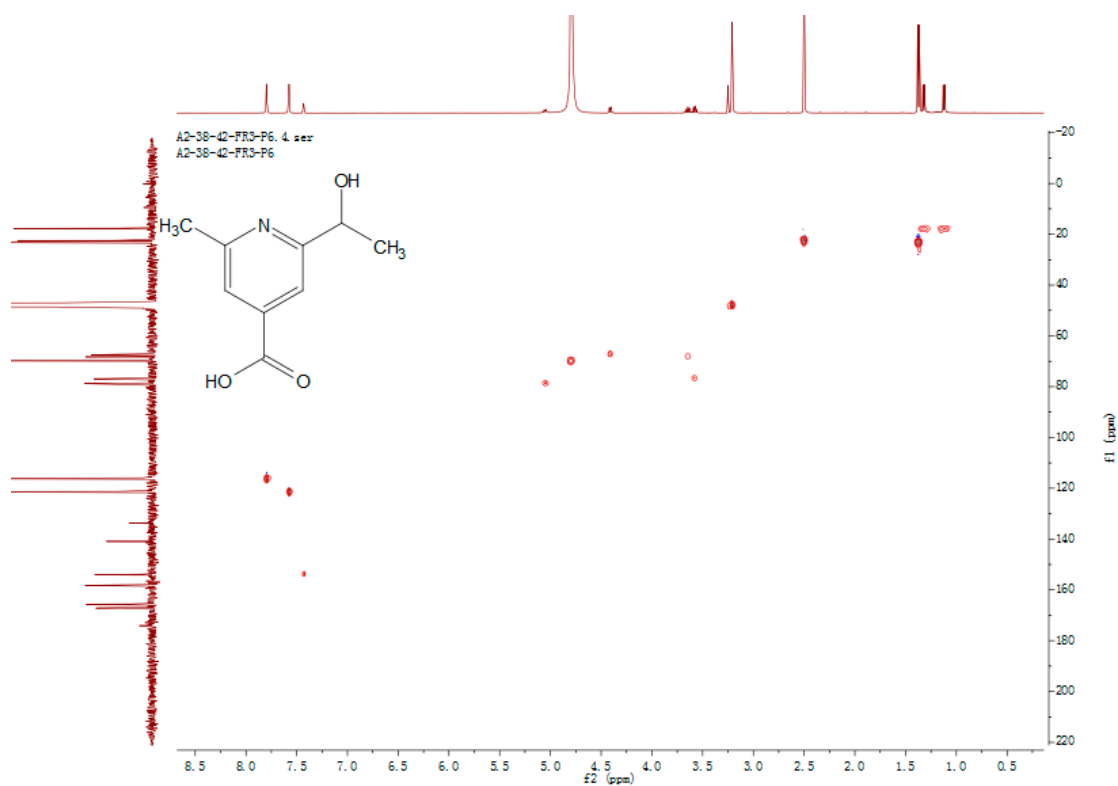

**Figure S23.** HSQC spectrum of compound **7** in  $\text{CD}_3\text{OD}$ .

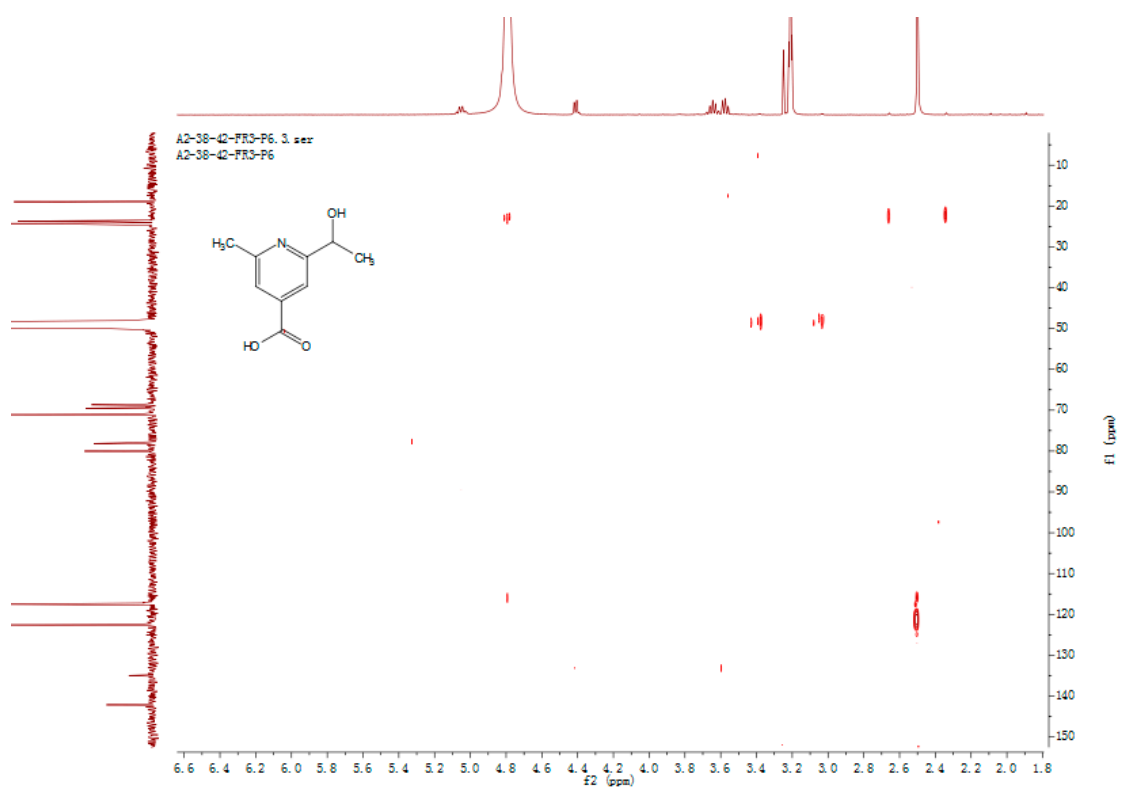

**Figure S24.** HMBC spectrum of compound **7** in CD<sub>3</sub>OD.

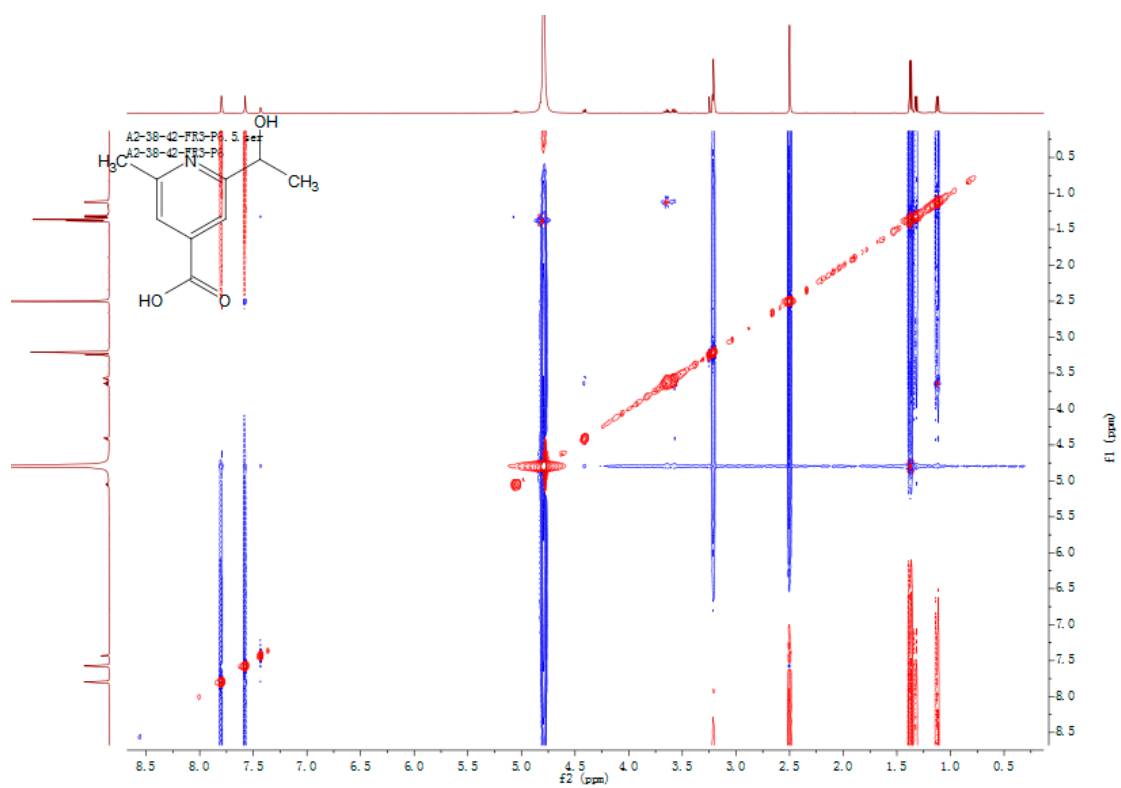

**Figure S25.** NOESY spectrum of compound **7** in CD<sub>3</sub>OD.



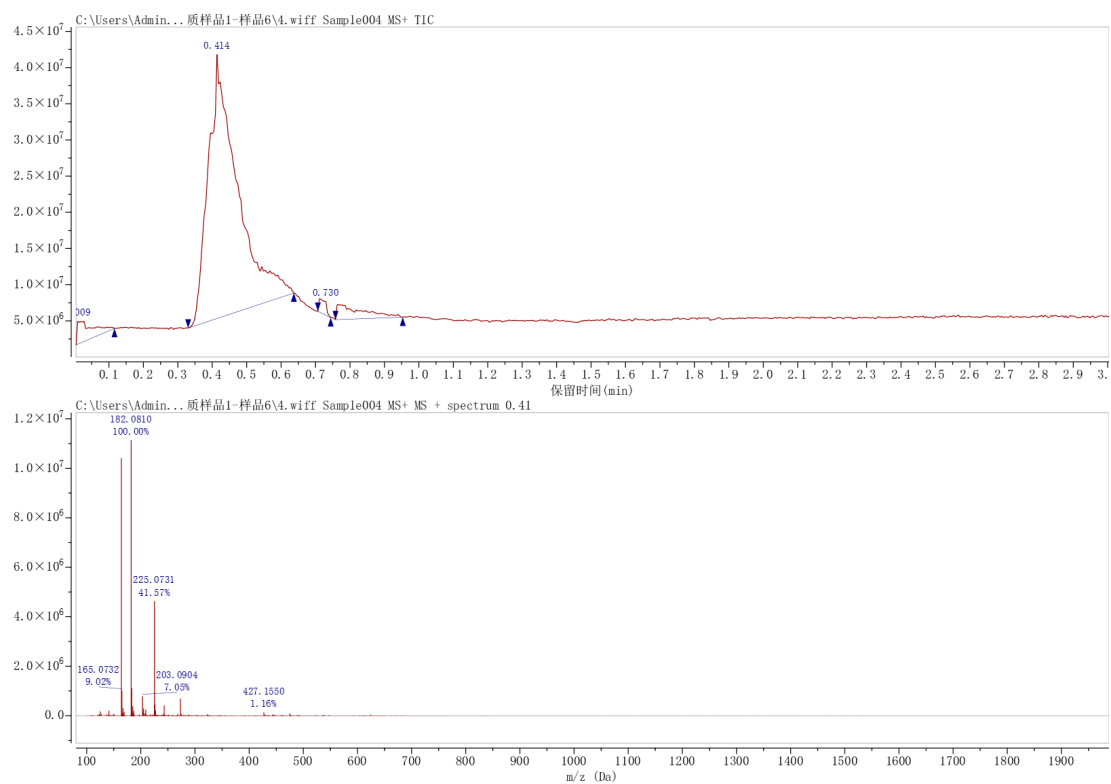

**Figure S26.** HRESIMS spectrum of compound 7.

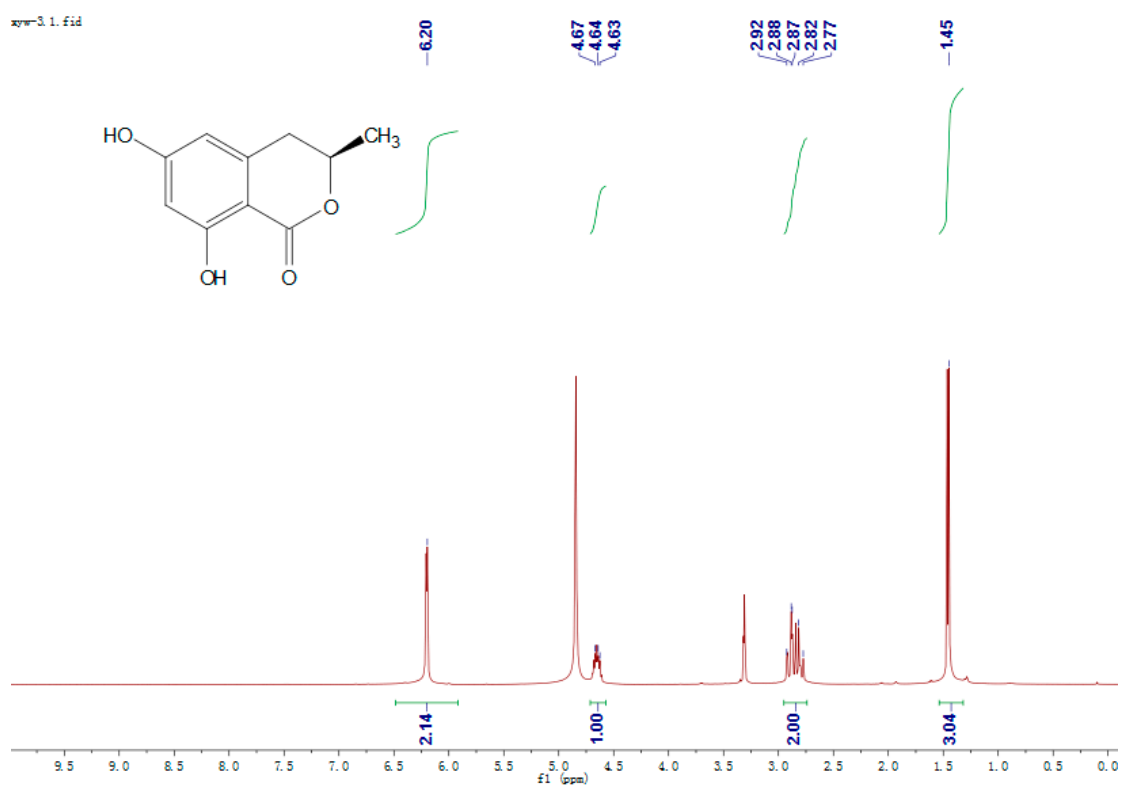

**Figure S27.**  $^1\text{H}$  NMR spectrum of compound 8 in  $\text{CD}_3\text{OD}$ .

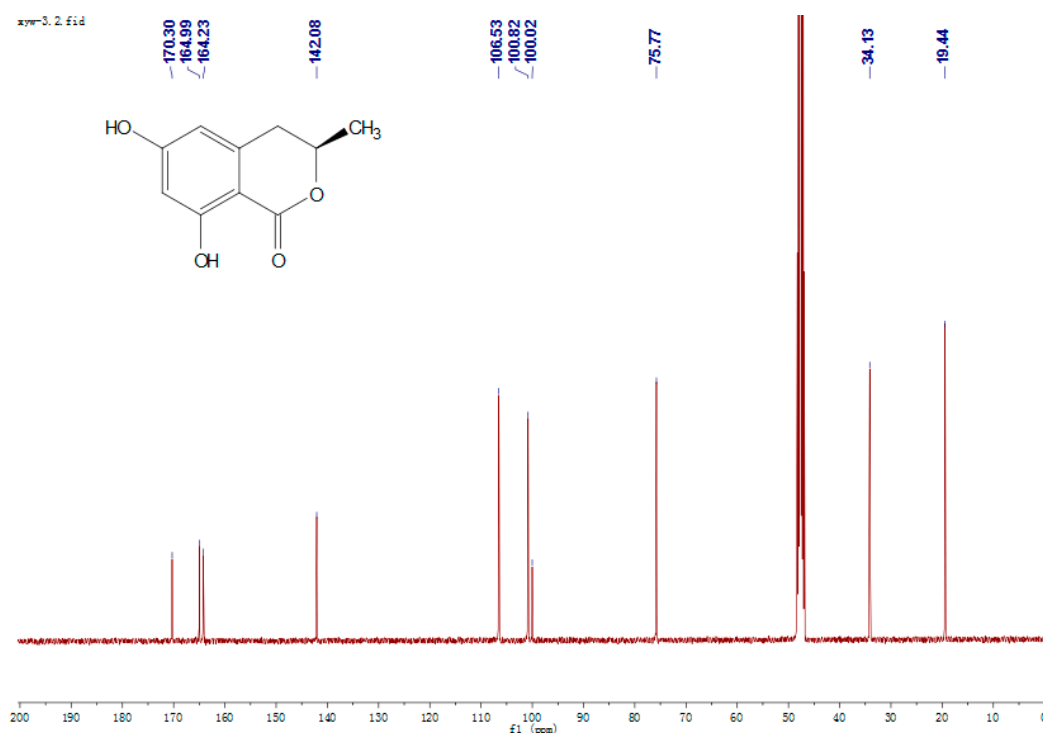

**Figure S28.** <sup>13</sup>C NMR spectrum of compound **8** in CD<sub>3</sub>OD.

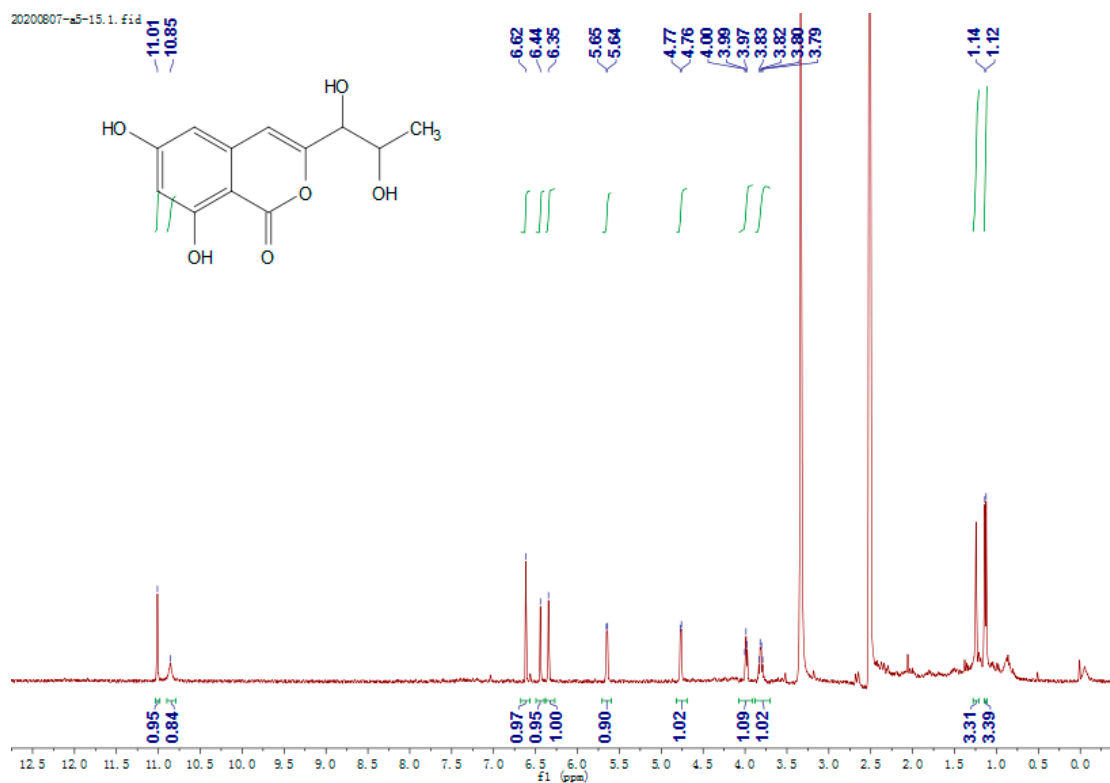

**Figure S29.** <sup>1</sup>H NMR spectrum of compound **9** in DMSO-*d*<sub>6</sub>.

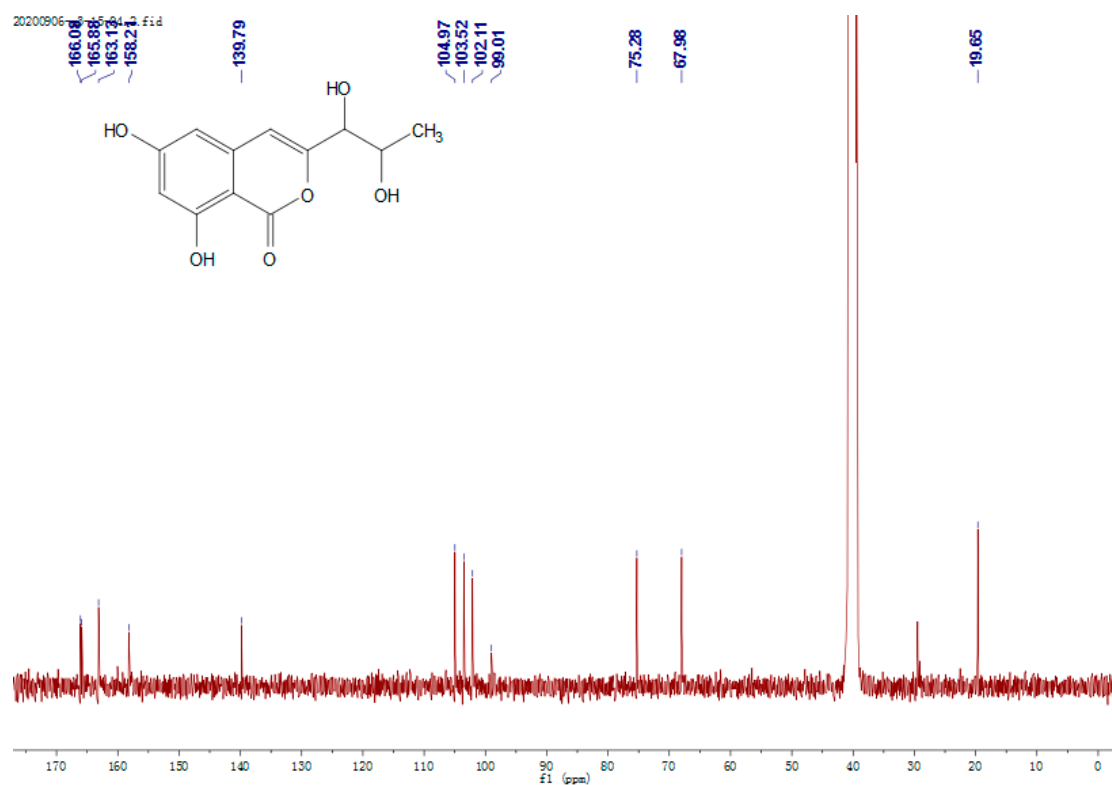

**Figure S30.**  $^{13}\text{C}$  NMR spectrum of compound **9** in  $\text{DMSO}-d_6$ .

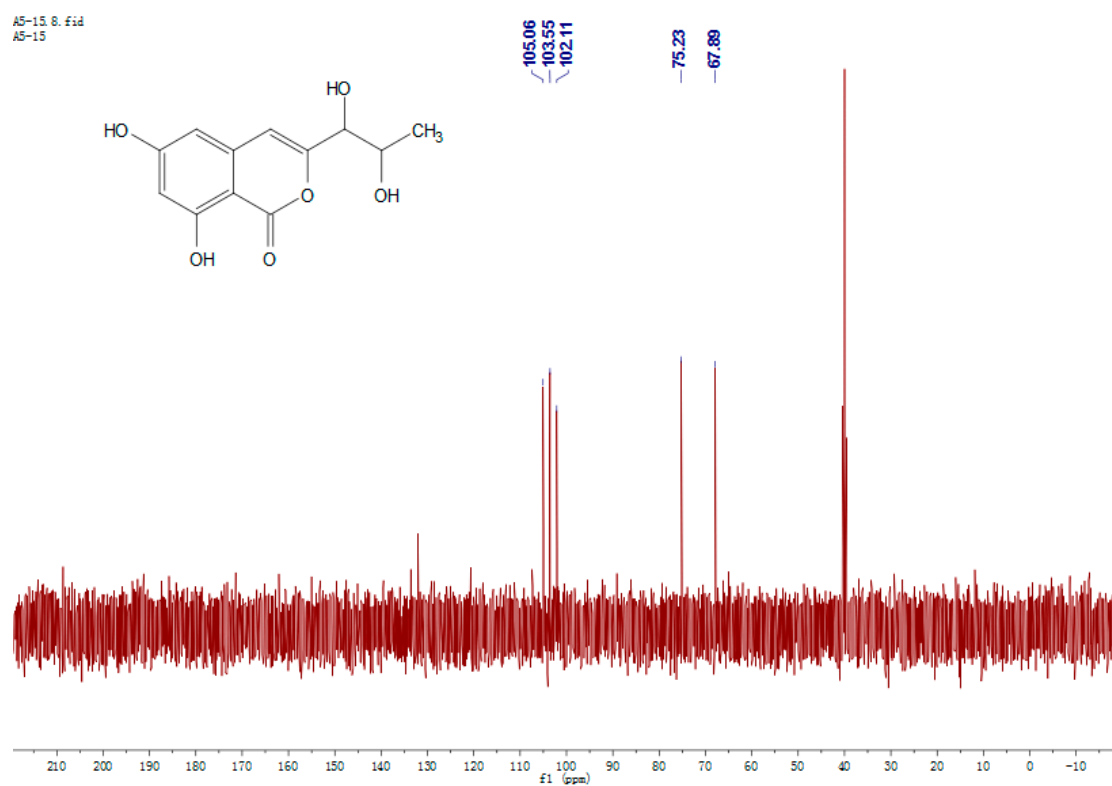

**Figure S31.** DEPT 90 spectrum of compound **9** in  $\text{DMSO}-d_6$ .

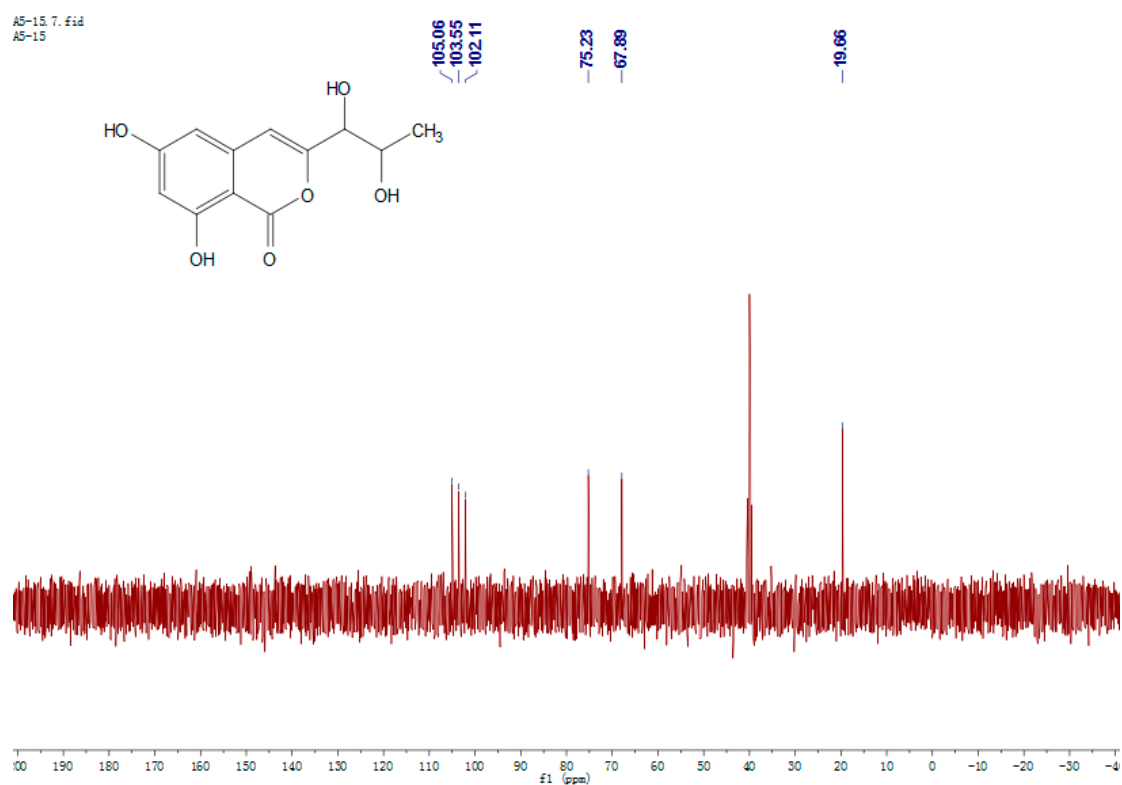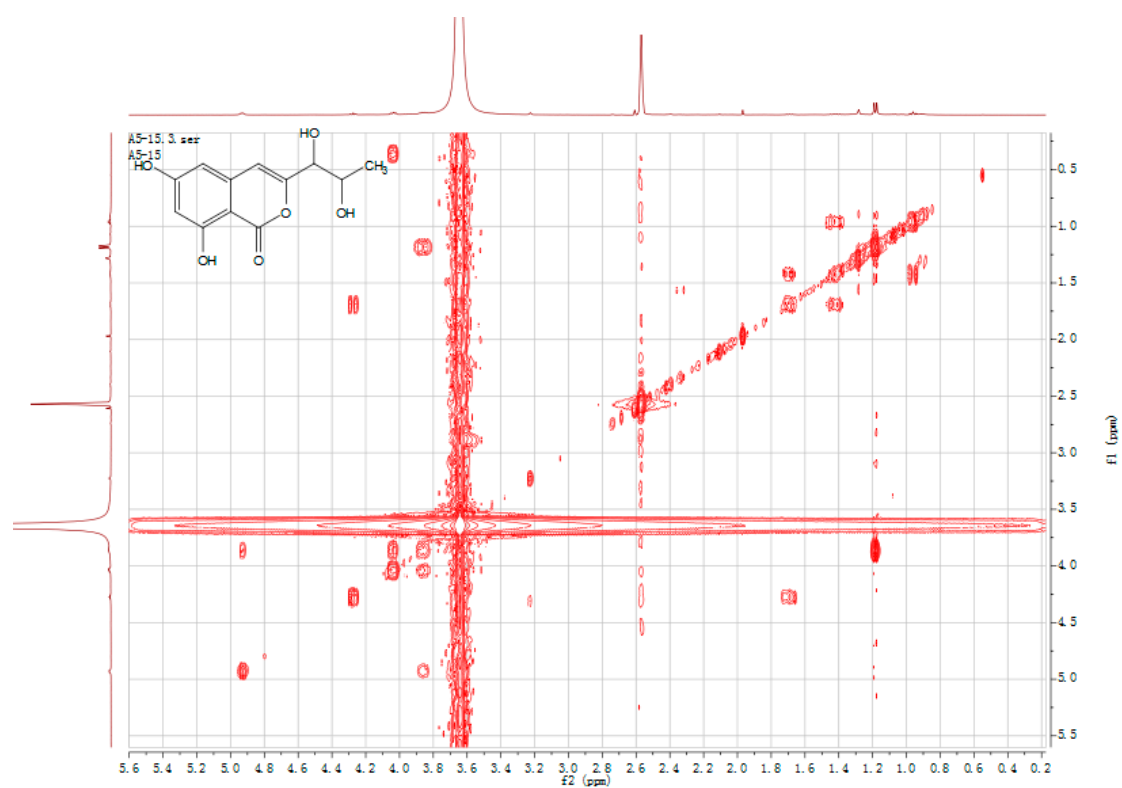

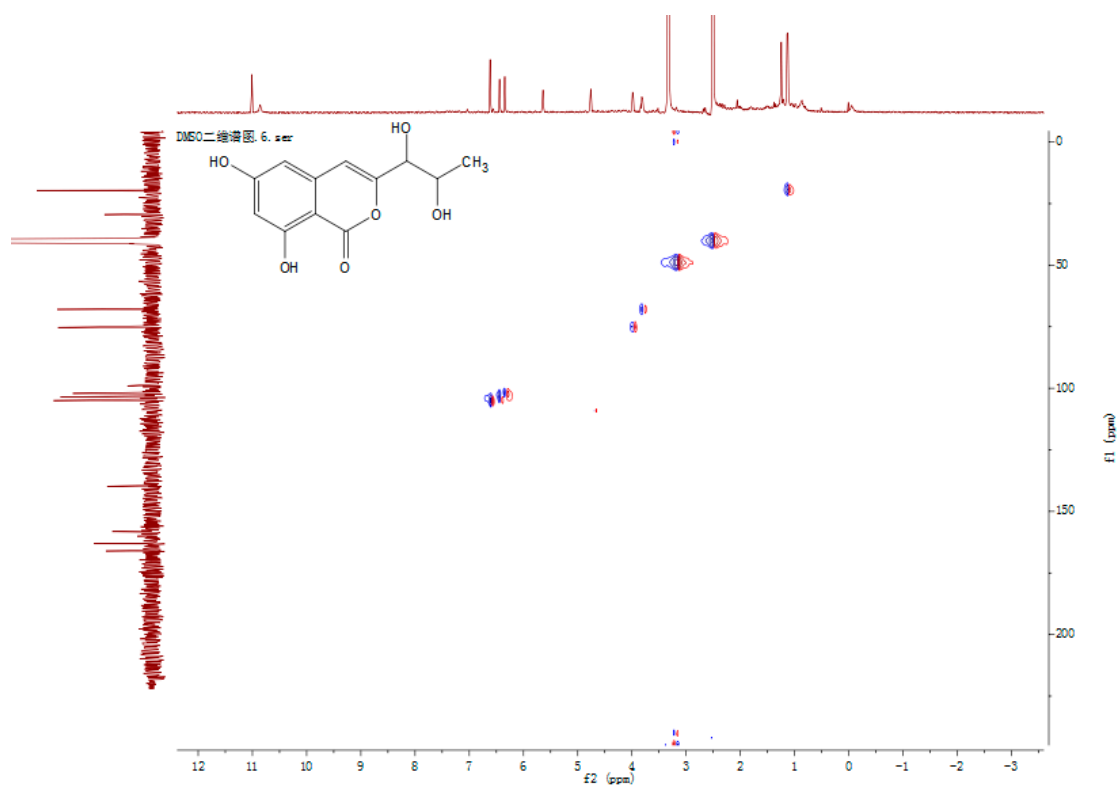

**Figure S34.** HSQC spectrum of compound **9** in DMSO- $d_6$ .

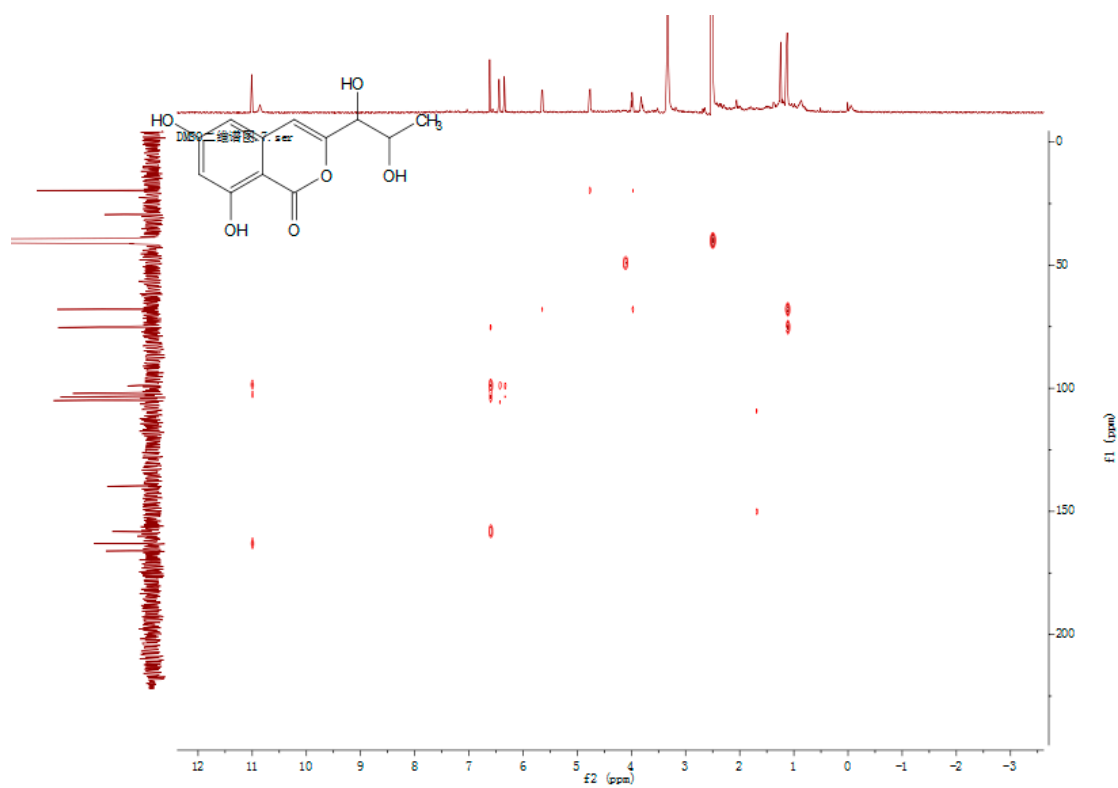

**Figure S35.** HMBC spectrum of compound **9** in DMSO- $d_6$ .

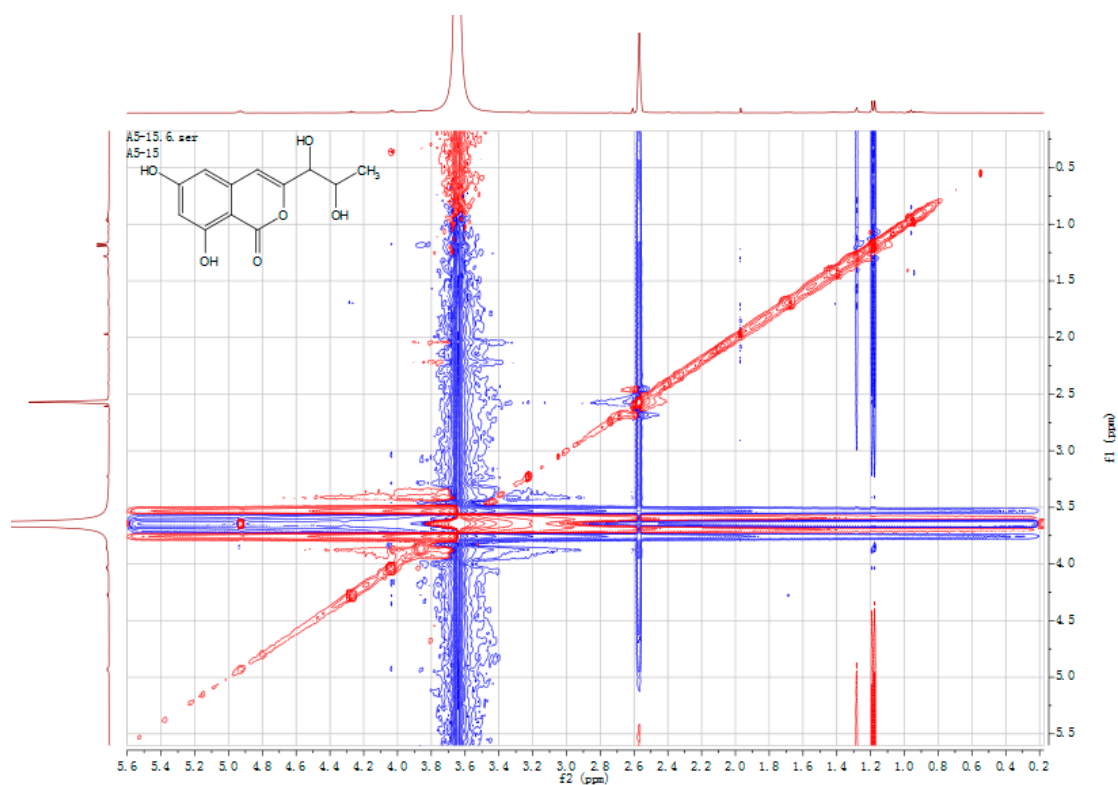

**Figure S36.** NOESY spectrum of compound **9** in DMSO-*d*<sub>6</sub>.

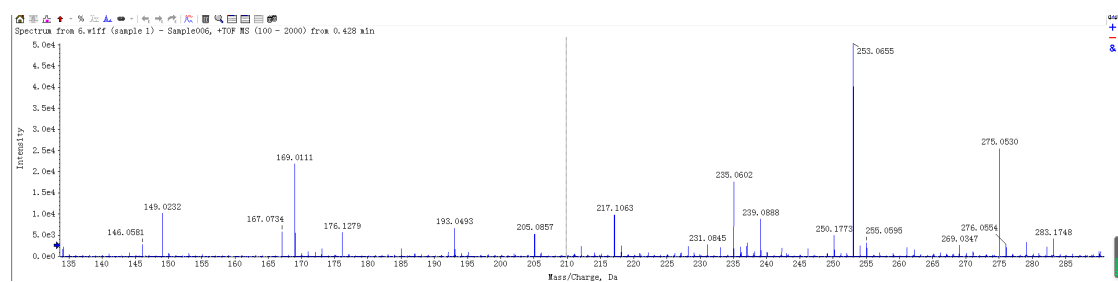

**Figure S37.** HRESIMS spectrum of compound **9**.

20200914-A5-30-p8.1.fid

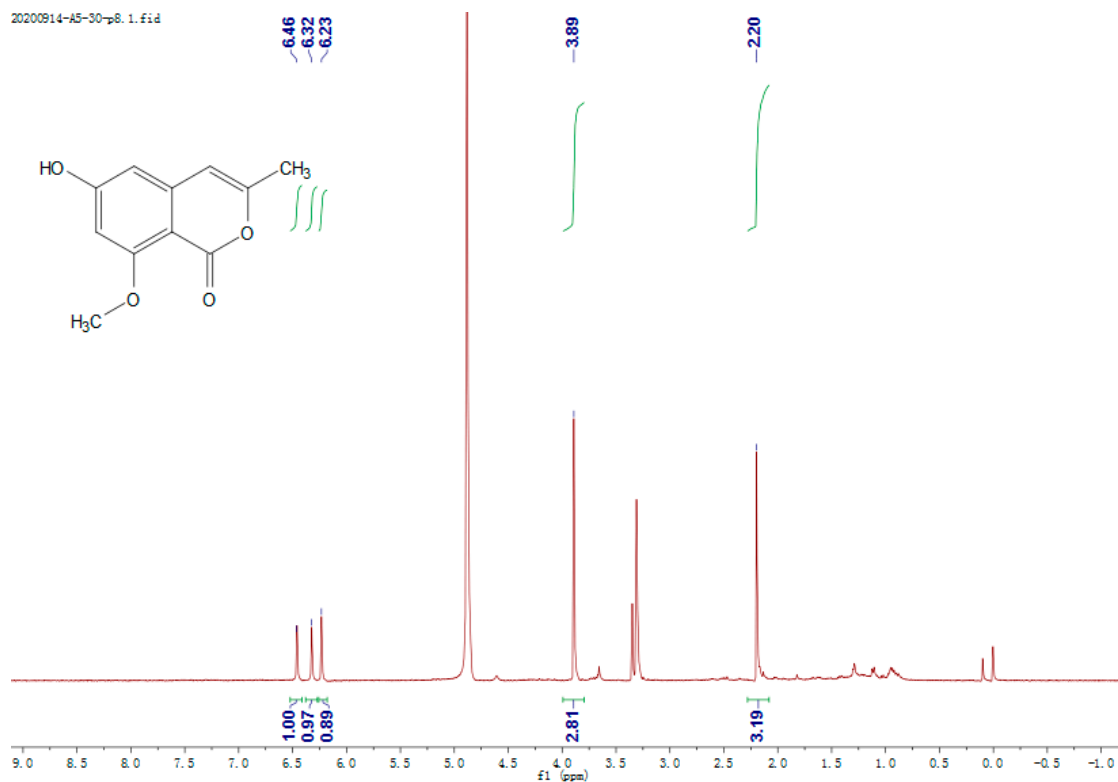

**Figure S38.** <sup>1</sup>H NMR spectrum of compound **10** in CD<sub>3</sub>OD.

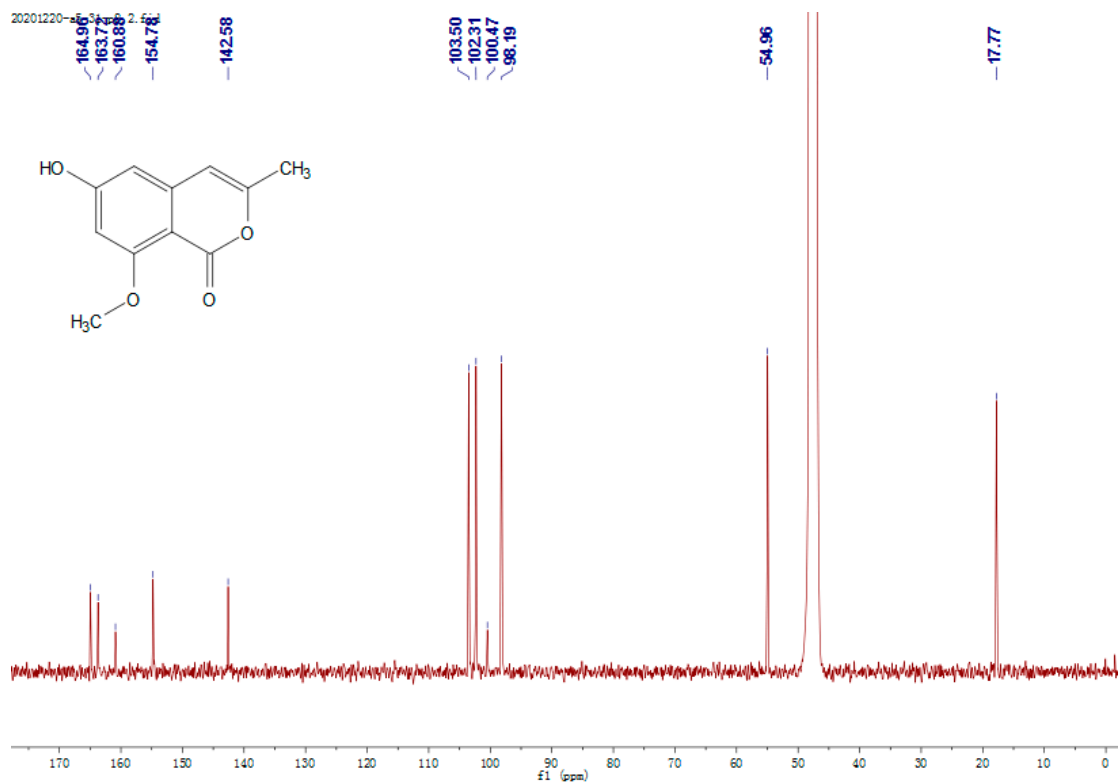

**Figure S39.** <sup>13</sup>C NMR spectrum of compound **10** in CD<sub>3</sub>OD.

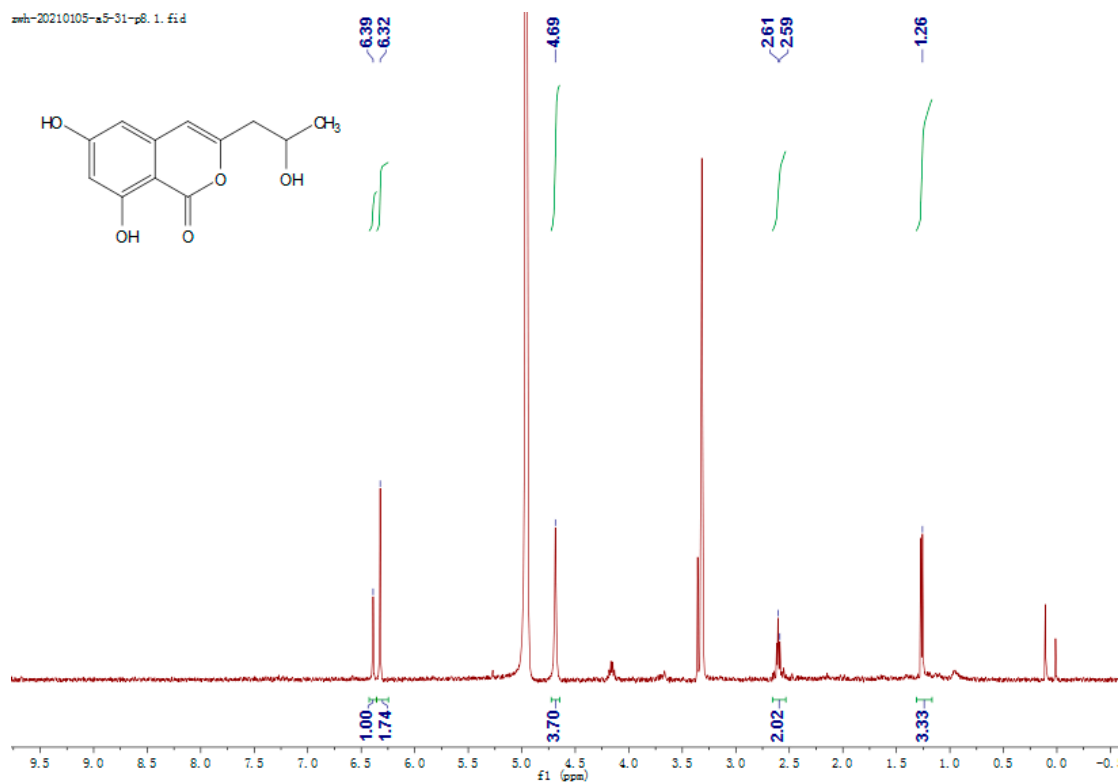

**Figure S40.** <sup>1</sup>H NMR spectrum of compound **11** in CD<sub>3</sub>OD.

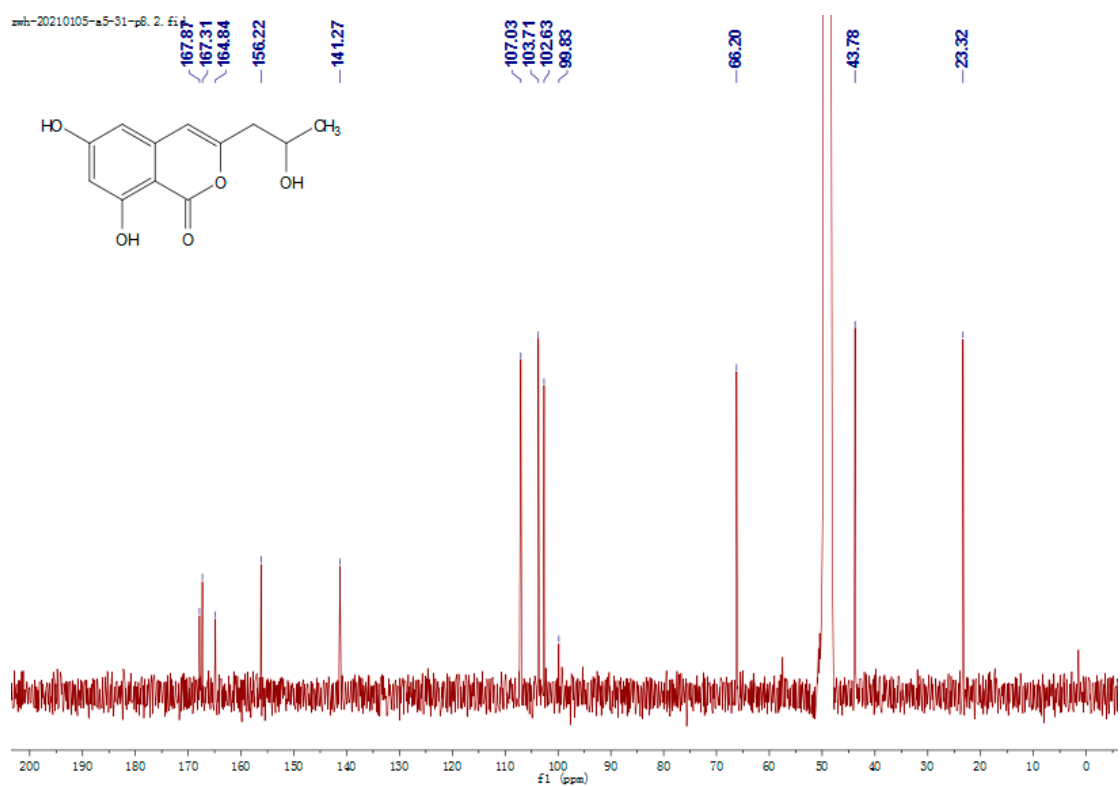

**Figure S41.** <sup>13</sup>C NMR spectrum of compound **11** in CD<sub>3</sub>OD.
